# High number of SARS-CoV-2 persistent infections uncovered through genetic analysis of samples from a large community-based surveillance study

Mahan Ghafari<sup>\*1,2</sup>, Matthew Hall<sup>1</sup>, Tanya Golubchik<sup>1,3</sup>, Daniel Ayoubkhani<sup>4,5</sup>, Thomas House<sup>6</sup>, George MacIntyre-Cockett<sup>1,7</sup>, Helen Fryer<sup>1</sup>, Laura Thomson<sup>1</sup>, Anel Nurtay<sup>1</sup>, David Buck<sup>7</sup>, Angie Green<sup>7</sup>, Amy Trebes<sup>7</sup>, Paolo Piazza<sup>7</sup>, Lorne J Lonie<sup>7</sup>, Ruth Studley<sup>4</sup>, Emma Rourke<sup>4</sup>, Darren Smith<sup>8,9</sup>, Matthew Bashton<sup>8,9</sup>, Andrew Nelson<sup>9</sup>, Matthew Crown<sup>8,9</sup>, Clare McCann<sup>9</sup>, Gregory R Young<sup>8,9</sup>, Rui Andre Nunes dos Santos<sup>9</sup>, Zack Richards<sup>9</sup>, Adnan Tariq<sup>9</sup>, Roberto Cahuantzi<sup>4</sup>, Wellcome Sanger Institute COVID-19 Surveillance Team<sup>\*\*</sup>, COVID-19 Infection Survey Group, The COVID-19 Genomics UK (COG-UK) Consortium<sup>++,10</sup>, Jeff Barrett<sup>11</sup>, Christophe Fraser<sup>1,7,11</sup>, David Bonsall<sup>1,7,16</sup>, Ann Sarah Walker<sup>12,13,14,15</sup>, Katrina Lythgoe<sup>1,2</sup>

\*Corresponding author: [mahan.ghafari@ndm.ox.ac.uk](mailto:mahan.ghafari@ndm.ox.ac.uk)

<sup>1</sup>Big Data Institute, Nuffield Department of Medicine, University of Oxford, Old Road Campus, Oxford OX3 7LF, UK.

<sup>2</sup>Department of Biology, University of Oxford, Oxford OX1 3SZ, UK

<sup>3</sup>Sydney Infectious Diseases Institute (Sydney ID), School of Medical Sciences, Faculty of

<sup>4</sup>Office for National Statistics, Newport, UK

Medicine and Health, University of Sydney

<sup>5</sup>Leicester Real World Evidence Unit, Diabetes Research Centre, University of Leicester, Leicester, UK

<sup>6</sup>Department of Mathematics, University of Manchester, Manchester, M13 9PL, UK

<sup>7</sup>Wellcome Centre for Human Genetics, Nuffield Department of Medicine, NIHR Biomedical Research Centre, University of Oxford, Old Road Campus, Oxford OX3 7BN, UK.

<sup>8</sup>The Hub for Biotechnology in the Built Environment, Department of Applied Sciences, Faculty of Health and Life Sciences, Northumbria University, Newcastle upon Tyne, NE1 8ST, UK

<sup>9</sup>Department of Applied Sciences, Faculty of Health and Life Sciences, Northumbria University, Newcastle upon Tyne, NE1 8ST, UK

<sup>10</sup><https://www.cogconsortium.uk>

<sup>11</sup>Wellcome Sanger Institute, Cambridge CB10 1SA, UK

<sup>12</sup>Nuffield Department of Medicine, University of Oxford, Oxford, UK

<sup>13</sup>The National Institute for Health Research Health Protection Research Unit in Healthcare Associated Infections and Antimicrobial Resistance at the University of Oxford, Oxford, UK.

<sup>14</sup>The National Institute for Health Research Oxford Biomedical Research Centre, University of Oxford, Oxford, UK

<sup>15</sup>MRC Clinical Trials Unit at UCL, UCL, London, UK

<sup>16</sup>Oxford University Hospitals NHS Foundation Trust, John Radcliffe Hospital, Headington, Oxford OX3 9DU, UK

<sup>\*\*</sup>The full list of names is available at <https://www.sanger.ac.uk/project/wellcome-sanger-institute-covid-19-surveillance-team/>

<sup>++</sup>The full list of names and affiliations of COG-UK members is provided in the appendix

## **Abstract**

Persistent severe acute respiratory syndrome coronavirus 2 (SARS-CoV-2) infections may act as viral reservoirs that could seed future outbreaks <sup>1-5</sup>, give rise to highly divergent lineages <sup>6-8</sup>, and contribute to cases with post-acute Coronavirus disease 2019 (COVID-19) sequelae (Long Covid) <sup>9,10</sup>. However, the population prevalence of persistent infections, their viral load kinetics, and evolutionary dynamics over the course of infections remain largely unknown. We identified 381 infections lasting at least 30 days, of which 54 lasted at least 60 days. These persistently infected individuals had more than 50% higher odds of self-reporting Long Covid compared to the infected controls, and we estimate that 0.09-0.5% of SARS-CoV-2 infections can become persistent and last for at least 60 days. In nearly 70% of the persistent infections we identified, there were long periods during which there were no consensus changes in virus sequences, consistent with prolonged presence of non-replicating virus. Our findings also suggest reinfections with the same major lineage are rare and that many persistent infections are characterised by relapsing viral load dynamics. Furthermore, we found a strong signal for positive selection during persistent infections, with multiple amino acid substitutions in the Spike and ORF1ab genes emerging independently in different individuals, including mutations that are lineage-defining for SARS-CoV-2 variants, at target sites for several monoclonal antibodies, and commonly found in immunocompromised patients <sup>11-14</sup>. This work has significant implications for understanding and characterising SARS-CoV-2 infection, epidemiology, and evolution.

## **Main**

The emergence of highly divergent variants of SARS-CoV-2 has been a defining feature of the COVID-19 pandemic. While the evolutionary origins of these variants are still a matter of speculation, multiple pieces of evidence point to chronic persistent infections as their most likely source <sup>5,7,15</sup>. In particular, infections in immunocompromised patients who cannot clear the virus may lead to persistence for months <sup>6,7,16,17</sup> or even years <sup>8,18</sup> before potentially seeding new outbreaks in the community <sup>3</sup>. Persistence of SARS-CoV-2 during chronic infections exposes the viral population to host-immune responses and other selective pressures as a result of treatments over prolonged periods of time. They also release the virus from undergoing the tight population bottlenecks that are characteristic of SARS-CoV-2 transmission <sup>19,20</sup>, making the viral population less vulnerable to stochastic genetic drift. These adaptive intrahost changes can lead to elevated evolutionary rates, particularly in key regions of the Spike protein that are often associated with immune escape and elevated rates of transmission <sup>13,14</sup>.

Despite the significant public health implications of persistent infections, uncertainty still surrounds how common these infections are among the general population, how

long they last, their potential for adaptive evolution, and their contribution to Long Covid.

In this work, we leveraged genetic, symptom, and epidemiological data from the Office for National Statistics Covid Infection Survey (ONS-CIS)<sup>21</sup>, an ongoing large scale community-based surveillance study carried out in the UK. We identified individuals with persistent SARS-CoV-2 infection and characterised various aspects of their infection including evolutionary changes in the virus, viral load kinetics, number of reported symptoms, and prevalence of Long Covid.

### Identifying persistent infections

We considered more than 100,000 high-quality sequenced samples from the ONS-CIS collected between 2nd November 2020 to 15th August 2022, and representing ~95,000 people living in ~75,000 households across the UK (see **Methods**). Individuals in the survey were typically sampled once a week for the first four weeks of their enrolment, and then monthly thereafter. To identify persistent infections we first limited the dataset to individuals with two or more RT-PCR positive samples with cycle threshold (Ct) values  $\leq 30$  (in which sequencing was attempted; a proxy for viral load), taken at least 26 days apart, and where the consensus sequences were of the same major lineages of Alpha, Delta, BA.1 or BA.2 (BA.4 and BA.5 not considered). If those sequences also shared the same rare single nucleotide polymorphisms (SNPs) at one or more sites relative to the major-lineage population-level consensus, we classified them as having a persistent infection.

We defined a rare mutation as one observed in 400 or fewer samples within the entire ONS-CIS dataset, giving a false positive rate of identifying persistent infections of 0-3% depending on the major lineage (see **Methods** and **Supplementary Figure 1**). We note that the rare SNP method provides a conservative estimate for the true number of persistent infections since some persistent infections may not have rare mutations. To further evaluate the robustness of our method in identifying persistent infections, we considered the phylogenetic relationship between the sequences from persistent infections relative to other sequences of the same major lineage that belonged to individuals with only a single sequence within the ONS-CIS dataset. The great majority of sets of sequences identified as belonging to the same persistent infection formed monophyletic groups with strong bootstrap support (**Figure 1a**; see also **Supplementary Figure 2**). However, seven sequences did not group with the other sequence(s) from the same persistent infection. All of these had high Ct values (Ct~30) and poor genome coverage which may explain their lack of clustering on the phylogeny (**Supplementary Figure 2**).

We found 381 persistent infections with sequences spanning at least 26 days, of which 54 spanned at least 56 days, representing nearly 0.07% (54/77,561) of all individuals with one or more sequences (with Ct $\leq 30$ ) of the four major lineages we

investigated in this study (**Figure 1b**; see also **Table 1**). Notably, 9% (2/23), 9% (19/219), and 8% (8/208) of sequences from persistent infections with Alpha, Delta, and BA.1, respectively, were sampled weeks after when the corresponding major lineage has dropped to  $\leq 1\%$  frequency of all the ONS-CIS sequences (**Figure 1c**); the longest infection was with BA.1 and lasted for at least 193 days (see **Figure 1b**).

The actual duration of persistent infections are likely to be at least 3-4 days longer than the time between when the first and last sequenced samples were collected, since it typically takes 3-4 days since the start of infection for viral loads to be sufficiently high to be sequenced ( $Ct \leq 30$ )<sup>22,23</sup>, and similarly viral loads will be too low ( $Ct$  values too high) to sequence at the tail end of infection. Since individuals were typically sampled weekly during the first four weeks of enrollment, followed by monthly sampling thereafter, it is unsurprising that most persistent infections had observable durations clustering around 30 or 60 days (see **Supplementary Figure 3**).

We found evidence suggestive of transmission from 11 persistently infected individuals: we identified two households each with two members having concurrent persistent infections, and in nine other households, one member tested positive for SARS-CoV-2 by RT-PCR within 10 days of a positive sequenced sample being collected from a persistently infected individual from the same household. As well as being clustered in households, the sequences from the suspected persistently infected source and the recipient had either no consensus nucleotide differences (nine cases) or one consensus nucleotide difference (two cases), consistent with transmission. If these do represent transmission, it is worth noting that none of these persistent infections involved highly divergent sequences relative to their first sequence, and hence these do not provide an example of the emergence and spread of highly divergent lineages.

#### Identifying reinfections with the same major lineage

We considered a pair of sequences from the same individual to indicate a reinfection if they were sampled at least 26 days apart, had at least one consensus nucleotide difference between the sequenced sampling timepoints, and shared no rare SNPs (see **Methods**). This criterion may overestimate the true number of reinfections as some persistent infections may not have a rare SNP, and within-host evolution can lead to the loss of a rare SNP and/or the gain of other mutations leading to differences in the consensus sequence between the samples. We identified three individuals for which pairs of sequences from different sampling timepoints had no identical rare SNPs and at least one consensus difference, but whose viral load trajectories were consistent with a persistent chronic infection. We therefore excluded these individuals from the reinfection group (see **Supplementary Figure 4**).

Overall, we identified 60 reinfections with the same major lineage (**Table 1**). Of all the cases classed as either persistent infections or reinfections with the same major lineage, 10-15% were classed as reinfections (see **Table 1**), rising to 20-40% if only samples collected at least 56 days apart were included (see **Figure 1b**). This suggests the number of individuals reinfected with the same major lineage is low compared to the number of individuals with persistent infection. Sequences from individuals identified as reinfected, collected at the point of primary infection and reinfection, did not form monophyletic groups and mostly belonged to distantly related subclades, and hence supports our method for identifying reinfections (**Figure 1a**; **Supplementary Figure 2**).

#### Evidence of non-replicating virus during infection

Of the 381 persistently infected individuals that we identified, nearly 70% (267/381) had a pair of sequenced samples taken at least 26 days apart with no nucleotide differences at the consensus level. This is striking given the between-host within-lineage evolutionary rate of SARS-CoV-2 of ~2 single nucleotide variants (SNVs) per month<sup>24-26</sup>. We contrasted the number of consensus nucleotide differences between pairs of samples from persistent infections with 16,000 random pairs of sequences sampled from the complete set of sequenced samples from the ONS-CIS, and with each pair from the same major lineage (**Supplementary Figure 5**). Of these, only 6 pairs had no SNVs (i.e., less than 0.04% of pairs).

#### Emergence of notable mutations

For all pairs of sequences from each of the persistent infections, we identified mutations for which there was a change in consensus between the two sampling time points. Among the 381 persistently infected individuals, we observed 317 changes in the consensus nucleotide representing 277 unique mutations, and 31 deletions representing 18 unique deletions. Many of these mutations have previously been identified as either lineage-defining mutations for variants of concern or variants of interest<sup>27</sup> (eight mutations and two deletions), recurrent mutations in immunocompromised individuals<sup>12-14</sup> (15 mutations and four deletions), or key mutations with antibody escape properties and target sites for various different monoclonal antibodies<sup>11,28</sup> (seven mutations) (**Supplementary Table 1**).

We observed several mutations at the same genomic positions in multiple individuals over the course of their persistent infections. For example, three BA.2 infected individuals from different households acquired a mutation at codon position 547 in Spike (**Figure 2**), two of which were the T547K mutation which is a lineage-defining mutation for BA.1, and one the K547T mutation (**Figure 2c**; also see **Supplementary Table 1**). Strikingly, twelve individuals acquired a deletion (ORF1ab: Δ81-87) in the NSP1 coding region. A similar deletion has previously been observed during the chronic infection of an immunocompromised individual with

cancer<sup>16</sup>, and was associated with lower type I interferon response in infected cells<sup>29</sup>. We also identified a persistent infection with BA.1 lasting for at least 133 days during which 33 unique mutations (23 mutations in ORF1ab, 6 in Spike, 1 in ORF3a, 1 in M, and 2 in ORF7) were observed (see **Supplementary Figure 2**); eleven of the ORF1ab mutations and all of the mutations in Spike, ORF3a, and ORF7 were nonsynonymous.

Overall, we observed a strong signal for positive selection in Spike, with nearly nine-fold more nonsynonymous compared to synonymous mutations (**Figure 2b**). With a total of seven nonsynonymous mutations, ORF8 had the highest per base number of nonsynonymous mutations followed by Spike with 61 nonsynonymous mutations.

#### Persistence with relapsing viral load

Of the 381 persistent infections, 65 had three or more RT-PCR tests taken over the course of their infection. We classified these infections as persistent-relapsing if they had a negative RT-PCR test during the infection (n=20), and the rest as persistent-chronic (n=45) (**Figure 3a,b**). Given the weekly or monthly sampling of individuals enrolled in the ONS-CIS, infections classed as persistent-chronic may have unsampled periods of very low viral burden, meaning the persistent-relapsing category is likely to be an underestimate. Nonetheless, the observation of relapsing viral load dynamics in over 30% of cases is striking given that, in the absence of genetic information, they could have been misidentified as reinfections, depending on the definition used. Of the 27 cases identified as reinfections with three or more RT-PCR tests, all showed relapsing viral load dynamics (**Figure 3c**).

As the sampling strategy of ONS-CIS is based on testing representative individuals across the UK regardless of symptoms, we can estimate the percentage of SARS-CoV-2 infections that are persistent and last for longer than 60 days in the general population. This requires making assumptions about how many persistent infections are missed among ONS-CIS participants due to the monthly (and weekly) sampling. More precisely, estimating the proportion of infections that are persistent depends on the proportion of days the infection has sequenceable virus during the infection (would have Ct≤30 if tested); the fewer the number of days the infection has sequenceable virus, the more likely it is that a persistent infection is missed. By taking two extreme scenarios for the proportion of days that the virus is sequenceable during persistent infection (0.7 and 0.14; see **Methods**), we estimate that approximately 0.1-0.5% of infections become persistent for 60 days or more.

#### Difference in viral load and symptoms

For the majority of persistent infections, Ct values (inversely proportional to viral titre<sup>30</sup>) were higher at the last sequenced time point compared to the first sequenced time point (**Figure 3d**). For reinfections with the same major lineage, the last

sequenced sample also had higher Ct values than the first, but the magnitude of the difference was smaller compared to persistent infections (**Figure 2d**). In both cases, the rise in Ct value (decrease in viral titre) during infections or between reinfections could be a consequence of host immunity or within-host compartmentalisation. Additionally, the rise in Ct for reinfections could be due to the disproportionate sampling of individuals with older infections, which tend to have lower viral loads, towards the end of an epidemic wave <sup>31,32</sup>.

Individuals with persistent infections remained largely asymptomatic during the later stages of infection, with, on average, reporting two fewer symptoms in the last 7 days at the last time of sampling (at which a sequence was obtained) when compared to the first. They also consistently reported very few or no symptoms after the first positive sample (**Figure 3e**). In comparison, individuals reinfected with the same major lineage reported on average only one fewer symptom at the reinfection sampling time point compared to the primary sampling time point (**Figure 3e**).

### Prevalence of Long Covid

From February 2021, as well as reporting symptoms, participants were asked if they describe themselves as having Long Covid and still experiencing symptoms more than four weeks after they first had COVID-19 (see **Methods**). We estimated the prevalence of self-reported Long Covid in the persistently infected individuals compared with a control group, accounting for several confounding variables (see **Methods**). In the persistent infection group, 9.0% of respondents (32/354) self-reported Long Covid at their first visit  $\geq 12$  weeks since the start of infection, and 7.1% (19/266) reported Long Covid at  $\geq 26$  weeks. However, in the control group, only 5.1% (4,976/97,404) reported Long Covid at their first visit  $\geq 12$  weeks, and 4.5% (3,261/72,407) reported Long Covid at  $\geq 26$  weeks.

Correcting for confounders, we found strong evidence for a 55% higher odds of reporting Long Covid  $\geq 12$  weeks post-infection among persistently infected individuals compared to controls (Chi square test with Yates correction <sup>33</sup>  $p=0.004$  for the unadjusted model,  $p=0.021$  for the adjusted model), but no evidence of a difference for Long Covid  $\geq 26$  weeks post-infection ( $p=0.127$  for the unadjusted model,  $p=0.367$  for the adjusted model) (**Table 2**). The lower rate of reporting Long Covid 26 weeks post-infection could be because the majority of the persistent infections we identified lasted for less than 26 weeks, and hence persistence of an infection may no longer be a contributing factor to Long Covid.

### **Discussion**

We developed a robust approach for identifying persistent SARS-CoV-2 infections in individuals with sequenced samples spanning a month or longer. Of the 381 persistent infections we identified among participants of the ONS-CIS, 54 lasted at

least two months, two over six months, and in some cases the infecting lineage had gone extinct in the general population. In contrast, we only identified 60 reinfections by the same major lineage as the primary infection, suggesting immunity to the same variant remains strong after infection, at least until the lineage has gone extinct.

The large number of persistent infections we uncovered is striking, given the leading hypothesis that many of the variants of concern (VOCs) emerged wholly or partially during long-term chronic infections in immunocompromised individuals<sup>1</sup>. Since the ONS-CIS is a community-based surveillance study, our observations suggest the pool of people in which long-term infections could occur, and hence potential sources of divergent variants, may be much larger than generally thought. We estimate that more than nearly one in a thousand of all infections, and potentially as many as one in 200, may become persistent for at least two months. The harbouring of these persistent infections in the general community may also help explain the early detection of cryptic lineages circulating in wastewaters<sup>34,35</sup> long before they spread in the population at large.

In support of the hypothesis that VOCs may emerge during prolonged infections, a number of studies have shown elevated evolutionary rates driven by selection during chronic infections of immunocompromised individuals<sup>6–8</sup>. Among the persistently infected individuals we identified, we also found strong evidence for positive selection and parallel evolution, particularly in Spike and ORF1ab. In the most extreme case, we observed one persistent infection with 33 substitutions over a four-month period, 20 of which were nonsynonymous.

Potentially more remarkable, however, was our discovery of viral infections exhibiting latent evolutionary dynamics, with no consensus level genome changes for two months or longer. As far as we are aware, this is the first study to demonstrate that decelerated evolutionary rates may be a common outcome of persistent infection. The factors causing these low rates of evolution are unknown, but one possible explanation is infection of long-lived cells<sup>36,37</sup> which then seed new outbreaks within the infected individual weeks or months later. Although the relapsing viral load dynamics we found in many of the persistently infected individuals supports this hypothesis, we did not find any consistent pattern between the amount of viral divergence during infection and the lower viral load activity in these individuals.

Intriguingly, individuals with persistent infections report fewer symptoms later in a persistent infection compared to at their first positive sample, or remain asymptomatic throughout infection, but have more than 50% higher odds of Long Covid compared to a control group. Although the link between viral persistence and Long Covid may not be causal, these results suggest persistent infections could be contributing to the pathophysiology of Long Covid<sup>10,38</sup>, as also evidenced by the observation of circulating SARS-CoV-2 S1 spike protein in a subset of patients with Long Covid months after first infection<sup>39</sup>. The association between persistent



infection and Long Covid does not imply that every persistent infection can lead to Long Covid, only 9% of persistently infected individuals reported having Long Covid, nor does it mean that all cases of Long Covid are due to a persistent infection. Indeed, many other possible mechanisms have been suggested to contribute to Long Covid including autoimmunity/inflammation, organ damage, EBV reactivation, and micro thrombosis (see ref <sup>10</sup> for a recent review).

Taken together, our observations highlight the continuing importance of community-based genomic surveillance both to monitor the emergence and spread of new variants, but also to gain a fundamental understanding of the natural history and evolution of novel pathogens and their clinical implications for patients.

## Methods

### ONS COVID-19 Infection Survey

The ONS-CIS is a UK household-based surveillance study in which participant households are approached at random from address lists across the country to provide a representative sample of the population <sup>40</sup>. All individuals aged two years and older from each household who provide written informed consent provide swab samples (taken by the participant or parent/carer for those under 12 years), regardless of symptoms, and complete a questionnaire at assessments, which occur weekly for the first month in the survey and then monthly. From 26 April 2020 to 31 July 2022, assessments were conducted by study workers visiting each household; from 14 July 2022 onwards assessments were remote, with swabs taken using kits posted to participants and returned by post or courier, and questionnaires completed online or by telephone. Positive swab samples with  $Ct \leq 30$  were sent for sequencing (see below). For this analysis, we included data from 2nd November 2020 to 15th August 2022, spanning a period from the earliest Alpha to latest Omicron BA.2 sequences within the ONS-CIS dataset.

This work contains statistical data from ONS which is Crown Copyright. The use of the ONS statistical data in this work does not imply the endorsement of the ONS in relation to the interpretation or analysis of the statistical data. This work uses research datasets which may not exactly reproduce National Statistics aggregates.

### Sequencing

From December 2020 onwards sequencing was attempted on all positive samples with  $Ct \leq 30$ ; before this date, sequencing was attempted in real-time wherever possible, with some additional retrospective sequencing of stored samples. The vast majority of samples were sequenced on Illumina Novaseq, with a small number using Oxford Nanopore GridION or MINION. One of two protocols were used: either

the ARTIC amplicon protocol<sup>41</sup> with consensus FASTA sequence files generated using the ARTIC nextflow processing pipeline<sup>42</sup>, or veSeq, an RNASeq protocol based on a quantitative targeted enrichment strategy<sup>19,43</sup> with consensus sequences produced using *shiver*<sup>44</sup>. During our study period, we identified 94,943 individuals with a single sequence and 5,774 individuals with two or more sequences. Here, we only included sequences with  $\geq 50\%$  genome coverage.

#### Identifying rare SNPs

An important criterion for determining whether two sequences from the same individual are from the same infection is whether they share a rare single nucleotide polymorphism (SNP). These are defined as SNPs that are shared by fewer than 400 sequences corresponding to each major lineage within the full ONS-CIS dataset (**Supplementary Figure 1**). The thresholds were chosen to maximise the number of persistent infections identified whilst minimising the number of false positives (see below). The major lineages we considered were Alpha (B.1.1.7), Delta (B.1.617.2), Omicron BA.1 and Omicron BA.2, including their sublineages. Approximately 92-98% of all sequences from the four major lineages had a rare SNP relative to the major-lineage population-level consensus.

#### Identifying reinfections with the same major lineage

Any pair of sequences from the same individual, of the same major lineage, and at least 26 days apart were considered as candidate reinfections. Of these, pairs that had at least one nucleotide difference at the consensus level, and did not share any rare SNPs, were classed as reinfections. Pairs that had no identical rare SNPs, nor any nucleotide differences at the consensus level, were classed as undetermined.

#### Identifying individuals with persistent infection

We first identified individuals with two or more sequenced samples taken at least 26 days apart. We chose this cutoff because the majority of acutely infected individuals shed the virus for  $<20$  days and no longer than 30 days in the respiratory tract<sup>23,45</sup>. Given the extreme heterogeneity in the shedding profiles during some acute infections<sup>23</sup>, we also considered a more conservative 56-day cutoff for some analyses.

For each identified individual we calculated the number of consensus nucleotide differences per site for all within-individual pairwise combinations of samples (**Supplementary Figure 6**). Only sites where a nucleotide difference could be called were included.

Candidate persistent infections were defined in one of two ways: (1) pairs of sequenced samples that belonged to the same major lineage, and (2) pairs of

sequenced samples where one or both had no defined phylogenetic lineage, but where the genetic distance between them was lower than that required to differentiate two major lineages (see **Supplementary Figure 6**). We assumed pairs belonging to different major lineages were either coinfections or reinfections with two different virus lineages. Only candidate persistent infections were considered in further analysis.

Among the pool of candidate persistent infections, we defined persistent infections as those with sequences sharing one or more rare SNPs at two or more consecutive time points relative to the population-level consensus. A rare SNP is one that is observed in 400 or fewer samples within the entire ONS-CIS dataset.

#### Determining the false positive rate for persistent infections

For each major lineage we generated a data set of 1,000 randomly paired sequences from different individuals in the ONS-CIS, each sampled at least 26 days apart. We determined the number of these pairs that would have been incorrectly identified as persistent infections as a function of the threshold for determining if a SNP is rare (**Supplementary Figure 1**). Although the total number of persistent infections identified grew as the threshold for determining if a SNP is rare increased, at very high thresholds the rate of false positives was also high. In our study, we chose a threshold of 400 sequences (corresponding to all sequences of the same major lineage within the full ONS-CIS dataset) for all of the major lineages, giving a false positive rate (identifying an infection as persistent when it was not) of 0-3%.

#### Estimating the prevalence of persistent infections

Within the ONS-CIS we identified 54 infections that lasted 60 days or more. Comparing this to the number of individuals that had sequenced samples belonging to Alpha, Delta, BA.1 or BA.2, which to a good approximation will be the number of infections of these variants, we identified approximately 54/77,561 (0.07%) infections as persistent for  $\geq 60$  days. Since the ONS-CIS is a representative sample of individuals from the general population, we can estimate the percentage of all SARS-CoV-2 infections that became persistent for two months or longer. At one extreme, if all persistent infections have sequenceable virus for only four days per month (assuming viral dynamics similar to one acute infection each month), only 14% of persistent infections would be detected through monthly sampling. Correcting for this, we would estimate the percentage of persistent infections in the general population to be 0.5% ( $0.07\% / 0.14$ ). At the other extreme, if we assume all persistent-chronic infections (70% of persistent infections; see Main text) are detectable through monthly sampling, and the rest have detectable virus for 4 days per month, then we estimate that 74% ( $70\% + 0.14 \times 30\%$ ) of persistent infections were identified, giving an estimate of 0.09% ( $0.07\% / 0.74$ ) infections being persistent in the general population.

## Phylogenetic analysis

For each of the four major lineages, we chose 600 consensus sequences with at least 95% coverage from the ONS-CIS dataset using weighted random sampling, with each sample of major lineage  $i$  collected in week  $j$  given a weight  $1/n_{ij}$ , where  $n_{ij}$  is the number of sequences of major lineage  $i$  collected during week  $j$ <sup>25</sup>. These sequences were added as a background set to the collection of all consensus sequences for samples from persistent infections and reinfections. Mapping of each sequence to the Wuhan-Hu-1 reference sequence was already performed by *shiver* and thus a full alignment for each of the four lineages could be constructed using only this.

Maximum likelihood phylogenetic trees were constructed using IQ-TREE 1.6.12<sup>46</sup> using the GTR+gamma substitution model and the ultrafast bootstrap<sup>47</sup>. Each tree was rooted using the collection dates of the samples and the heuristic residual mean square algorithm in TempEst<sup>48</sup>. Visualisation used ggtree<sup>49</sup>.

## Comparing viral load activities and symptoms

To quantify the changes in viral load activities during persistent infections, we compared Ct values at the last time point a sequence was obtained to when the first sequence was collected. Similarly, for reinfections, we compared the changes in Ct value between the primary infection and reinfection. We used a paired t-test to calculate p-values in both cases as the distribution of differences in Ct values were normally distributed for both persistent infections ( $W=0.99$ ,  $p=0.28$ ) and reinfections ( $W=0.99$ ,  $p=0.78$ ) as determined by the Shapiro-Wilk test<sup>50</sup>.

We also tracked 12 symptoms consistently solicited from all participants at every assessment. Symptoms were fever, weakness/tiredness, diarrhoea, shortness of breath, headache, nausea/vomiting, sore throat, muscle ache, abdominal pain, cough, loss of smell, and loss of taste. At each follow-up assessment, participants were asked whether these 12 symptoms had been present in the past seven days. Symptom discontinuation was defined as the first occurrence of two successive follow-up visits without reporting symptoms. To compare symptom counts during persistent infections and reinfections, we used the paired Wilcoxon test as the distribution of symptom differences is not normally distributed (see **Figure 3d**).

## Long Covid analysis

From February 2021, at every assessment, participants were asked “would you describe yourself as having Long Covid, that is, you are still experiencing symptoms more than 4 weeks after you first had COVID-19, that are not explained by something else?”. When estimating Long Covid prevalence in this analysis, we

considered the first assessment at least 12 weeks and at least 26 weeks after infection. Our control group comprised all individuals with a positive PCR test and  $Ct \leq 30$ , excluding the persistently infected individuals identified in this study, over the same time span as persistent infections. We also ensured the follow-up from the start of infection to first Long Covid response was similar between persistent infections and controls (see **Table 2**).

In calculating the odds ratio of Long Covid in persistently infected individuals relative to the control group, we accounted for confounding variables such as age at the last birthday, sex, Ct value, calendar date, area deprivation quintile group, presence of self-reported long-term health conditions (binary), vaccination status (unvaccinated or single-vaccinated, fully-vaccinated or booster-vaccinated 14-89 days ago, fully-vaccinated or booster-vaccinated 90-179 days ago, fully-vaccinated or booster-vaccinated  $\geq 180$  days ago), and days from first positive test to Long Covid follow-up response. All variables except the last one were defined at the time of the first positive test. Continuous variables (age, Ct value, calendar date, days to follow-up response) were modelled as restricted cubic splines with a single internal knot at the median of the distribution and boundary knots at the 5<sup>th</sup> and 95<sup>th</sup> percentiles. Vaccination status was derived from a combination of CIS and NIMS data for participants in England, and CIS data alone for participants in Wales, Scotland and Northern Ireland.

We were unable to do the Long Covid analysis for the reinfection group due to the low number of participants in this cohort who reported new-onset Long Covid  $\geq 12$  weeks or  $\geq 26$  weeks after infections.

## **Funding Statement**

The CIS was funded by the Department of Health and Social Care and the UK Health Security Agency with in-kind support from the Welsh Government, the Department of Health on behalf of the Northern Ireland Government and the Scottish Government. COG-UK is supported by funding from the Medical Research Council (MRC) part of UK Research & Innovation (UKRI), the National Institute of Health Research (NIHR) (grant code: MC\_PC\_19027), and Genome Research Limited, operating as the Wellcome Sanger Institute. The authors acknowledge use of data generated through the COVID-19 Genomics Programme funded by the Department of Health and Social Care. ASW is supported by the National Institute for Health Research Health Protection Research Unit (NIHR HPRU) in Healthcare Associated Infections and Antimicrobial Resistance at the University of Oxford in partnership with the UK Health Security Agency (UK HSA) (NIHR200915) and the NIHR Oxford Biomedical Research Centre, and is an NIHR Senior Investigator. TH is supported by the Royal Society and Alan Turing Institute for Data Science and Artificial Intelligence. KAL is supported by the Royal Society and the Wellcome Trust

(107652/Z/15/Z). The research was supported by the Wellcome Trust Core Award Grant Number 203141/Z/16/Z with funding from the NIHR Oxford BRC. The views expressed are those of the author(s) and not necessarily those of the NHS, the NIHR or the Department of Health. The views expressed are those of the author and not necessarily those of the Department of Health and Social Care or UKHSA.

#### **Data and materials availability**

All genomic data have been made publicly available as part of the COVID-19 Genomics UK (COG-UK) Consortium <sup>51</sup>. All other data, excluding personal clinical information on participants, are available in the main text, supplementary materials, or our GitHub repository ([https://github.com/mg878/ONS-CIS\\_analysis](https://github.com/mg878/ONS-CIS_analysis)).

## References

1. Dennehy, J. J., Gupta, R. K., Hanage, W. P., Johnson, M. C. & Peacock, T. P. Where is the next SARS-CoV-2 variant of concern? *Lancet* **399**, 1938–1939 (2022).
2. Otto, S. P. *et al.* The origins and potential future of SARS-CoV-2 variants of concern in the evolving COVID-19 pandemic. *Curr. Biol.* **31**, R918–R929 (2021).
3. Gonzalez-Reiche, A. S. *et al.* SARS-CoV-2 variants in the making: Sequential intrahost evolution and forward transmissions in the context of persistent infections. *medRxiv* 2022.05.25.22275533 (2022) doi:10.1101/2022.05.25.22275533.
4. Hill, V. *et al.* The origins and molecular evolution of SARS-CoV-2 lineage B.1.1.7 in the UK. *Virus Evolution* **8**, veac080 (2022).
5. Ghafari, M., Liu, Q., Dhillon, A., Katzourakis, A. & Weissman, D. B. Investigating the evolutionary origins of the first three SARS-CoV-2 variants of concern. *Frontiers in Virology Section: Diversification and Evolution*, (2022).
6. Choi, B. *et al.* Persistence and Evolution of SARS-CoV-2 in an Immunocompromised Host. *N. Engl. J. Med.* **383**, 2291–2293 (2020).
7. Kemp, S. A. *et al.* SARS-CoV-2 evolution during treatment of chronic infection. *Nature* **592**, 277–282 (2021).
8. Chaguza, C. *et al.* Accelerated SARS-CoV-2 intrahost evolution leading to distinct genotypes during chronic infection. *medRxiv* (2022) doi:10.1101/2022.06.29.22276868.
9. Swank, Z. *et al.* Persistent Circulating Severe Acute Respiratory Syndrome Coronavirus 2 Spike Is Associated With Post-acute Coronavirus Disease 2019 Sequelae. *Clin. Infect. Dis.* ciac722 (2022) doi:10.1093/cid/ciac722.
10. Davis, H. E., McCorkell, L., Vogel, J. M. & Topol, E. J. Long COVID: major findings, mechanisms and recommendations. *Nat. Rev. Microbiol.* (2023) doi:10.1038/s41579-022-00846-2.
11. Starr, T. N. *et al.* Deep Mutational Scanning of SARS-CoV-2 Receptor Binding Domain Reveals Constraints on Folding and ACE2 Binding. *Cell* **182**, 1295–1310.e20 (2020).

12. McCarthy, K. R. *et al.* Recurrent deletions in the SARS-CoV-2 spike glycoprotein drive antibody escape. *Science* **371**, 1139–1142 (2021).
13. Harari, S. *et al.* Drivers of adaptive evolution during chronic SARS-CoV-2 infections. *Nature Medicine* **28**, 1501–1508 (2022).
14. Wilkinson, S. A. J. *et al.* Recurrent SARS-CoV-2 mutations in immunodeficient patients. *Virus Evol* **8**, veac050 (2022).
15. Rambaut, A. *et al.* Preliminary genomic characterisation of an emergent SARS-CoV-2 lineage in the UK defined by a novel set of spike mutations. *Virological* <https://virological.org/t/preliminary-genomic-characterisation-of-an-emergent-sars-cov-2-lineage-in-the-uk-defined-by-a-novel-set-of-spike-mutations/563> (2020).
16. Avanzato, V. A. *et al.* Case Study: Prolonged Infectious SARS-CoV-2 Shedding from an Asymptomatic Immunocompromised Individual with Cancer. *Cell* **183**, 1901–1912.e9 (2020).
17. Cele, S. *et al.* SARS-CoV-2 prolonged infection during advanced HIV disease evolves extensive immune escape. *Cell Host Microbe* **30**, 154–162.e5 (2022).
18. Nussenblatt, V. *et al.* Yearlong COVID-19 Infection Reveals Within-Host Evolution of SARS-CoV-2 in a Patient With B-Cell Depletion. *J. Infect. Dis.* **225**, 1118–1123 (2022).
19. Lythgoe, K. A. *et al.* SARS-CoV-2 within-host diversity and transmission. *Science* **372**, (2021).
20. Braun, K. M. *et al.* Acute SARS-CoV-2 infections harbor limited within-host diversity and transmit via tight transmission bottlenecks. *PLoS Pathog.* **17**, e1009849 (2021).
21. Pouwels, K. B. *et al.* Community prevalence of SARS-CoV-2 in England from April to November, 2020: results from the ONS Coronavirus Infection Survey. *Lancet Public Health* **6**, e30–e38 (2021).
22. Kissler, S. M. *et al.* Viral Dynamics of SARS-CoV-2 Variants in Vaccinated and Unvaccinated Persons. *N. Engl. J. Med.* **385**, 2489–2491 (2021).
23. Jones, T. C. *et al.* Estimating infectiousness throughout SARS-CoV-2 infection course. *Science* **373**, (2021).



24. Ghafari, M. *et al.* Purifying selection determines the short-term time dependency of evolutionary rates in SARS-CoV-2 and pH1N1 influenza. Preprint at <https://doi.org/10.1101/2021.07.27.21261148>.
25. Lythgoe, K. A. *et al.* Lineage replacement and evolution captured by the United Kingdom Covid Infection Survey. *medRxiv* (2022) doi:10.1101/2022.01.05.21268323.
26. Neher, R. A. Contributions of adaptation and purifying selection to SARS-CoV-2 evolution. *Virus Evol* **8**, veac113 (2022).
27. Hodcroft, E. B. CoVariants: SARS-CoV-2 Mutations and Variants of Interest. <https://covariants.org/> (2021).
28. Cox, M. *et al.* SARS-CoV-2 variant evasion of monoclonal antibodies based on in vitro studies. *Nat. Rev. Microbiol.* **21**, 112–124 (2023).
29. Lin, J.-W. *et al.* Genomic monitoring of SARS-CoV-2 uncovers an Nsp1 deletion variant that modulates type I interferon response. *Cell Host Microbe* **29**, 489–502.e8 (2021).
30. Tom, M. R. & Mina, M. J. To Interpret the SARS-CoV-2 Test, Consider the Cycle Threshold Value. *Clinical infectious diseases: an official publication of the Infectious Diseases Society of America* vol. 71 2252–2254 (2020).
31. Hay, J. A. *et al.* Estimating epidemiologic dynamics from cross-sectional viral load distributions. *Science* **373**, (2021).
32. Fryer, H. R. *et al.* Viral burdens are associated with age and viral variant in a population-representative study of SARS-CoV-2 that accounts for time-since-infection related sampling bias. Preprint at <https://doi.org/10.1101/2022.12.02.518847> (2022).
33. Yates, F. Contingency tables involving small numbers and the  $\chi^2$  test. *Suppl. J. R. Stat. Soc.* **1**, 217 (1934).
34. Karthikeyan, S. *et al.* Wastewater sequencing reveals early cryptic SARS-CoV-2 variant transmission. *Nature* **609**, 101–108 (2022).
35. Shafer, M. M. *et al.* Tracing the origin of SARS-CoV-2 Omicron-like Spike sequences detected in wastewater. *medRxiv* (2022) doi:10.1101/2022.10.28.22281553.
36. Lythgoe, K. A., Gardner, A., Pybus, O. G. & Grove, J. Short-Sighted Virus Evolution and

a Germline Hypothesis for Chronic Viral Infections. *Trends Microbiol.* **25**, 336–348 (2017).

37. Lythgoe, K. A., Lumley, S. F., Pellis, L., McKeating, J. A. & Matthews, P. C. Estimating hepatitis B virus cccDNA persistence in chronic infection. *Virus Evol* **7**, veaa063 (2021).

38. Marx, V. Scientists set out to connect the dots on long COVID. *Nat. Methods* **18**, 449–453 (2021).

39. Schultheiß, C. *et al.* Liquid biomarkers of macrophage dysregulation and circulating spike protein illustrate the biological heterogeneity in patients with post-acute sequelae of COVID-19. *J. Med. Virol.* **95**, e28364 (2023).

40. Pouwels, K. B. *et al.* Community prevalence of SARS-CoV-2 in England from April to November, 2020: results from the ONS Coronavirus Infection Survey. *Lancet Public Health* **6**, e30–e38 (2021).

41. COG-UK. COG-UK publication. <https://www.protocols.io/workspaces/coguk/publication> (2020).

42. Connor Lab. *ncov2019-artic-nf*. (Github).

43. Bonsall, D. *et al.* A Comprehensive Genomics Solution for HIV Surveillance and Clinical Monitoring in Low-Income Settings. *J. Clin. Microbiol.* **58**, (2020).

44. Wymant, C. *et al.* Easy and accurate reconstruction of whole HIV genomes from short-read sequence data with shiver. *Virus Evol* **4**, vey007 (2018).

45. Cevik, M. *et al.* SARS-CoV-2, SARS-CoV, and MERS-CoV viral load dynamics, duration of viral shedding, and infectiousness: a systematic review and meta-analysis. *Lancet Microbe* **2**, e13–e22 (2021).

46. Minh, B. Q. *et al.* IQ-TREE 2: New Models and Efficient Methods for Phylogenetic Inference in the Genomic Era. *Mol. Biol. Evol.* **37**, 1530–1534 (2020).

47. Hoang, D. T., Chernomor, O., von Haeseler, A., Minh, B. Q. & Vinh, L. S. UFBoot2: Improving the Ultrafast Bootstrap Approximation. *Mol. Biol. Evol.* **35**, 518–522 (2018).

48. Rambaut, A., Lam, T. T., Max Carvalho, L. & Pybus, O. G. Exploring the temporal structure of heterochronous sequences using TempEst (formerly Path-O-Gen). *Virus*

699       *Evol* **2**, vew007 (2016).

700   49. Yu, G., Smith, D. K. & Tsan-Yuk, Z. H. L. ggtree: an R package for visualization and  
701       annotation of phylogenetic trees with their covariates and other associated data.  
702       *Methods in Ecology and Evolution* **8**, 28–36 (2017).

703   50. Shapiro, S. S. & Wilk, M. B. An Analysis of Variance Test for Normality (Complete  
704       Samples). *Biometrika* **52**, 591–611 (1965).

705   51. COVID-19 Genomics UK (COG-UK) consortiumcontact@cogconsortium.uk. An  
706       integrated national scale SARS-CoV-2 genomic surveillance network. *Lancet Microbe* **1**,  
707       e99–e100 (2020).

708

## Tables

**Table 1: Frequency of persistent infections and reinfections per major lineage.**

| Major lineage | Reinfection >26 days | Reinfection >56 days | Persistent infection >26 days | Persistent infections >56 days | %Reinfection >26 days | %Reinfection >56 days |
|---------------|----------------------|----------------------|-------------------------------|--------------------------------|-----------------------|-----------------------|
| B.1.1.7       | 7                    | 3                    | 11                            | 3                              | 39%                   | 50%                   |
| B.1.617.2     | 11                   | 4                    | 106                           | 13                             | 9%                    | 24%                   |
| BA.1          | 14                   | 2                    | 97                            | 15                             | 13%                   | 12%                   |
| BA.2          | 28                   | 15                   | 167                           | 23                             | 14%                   | 40%                   |

**Table 2: Prevalence of Long Covid in persistently infected individuals.**

### Long Covid ≥12 weeks post-infection

| Group   | <i>n</i> | Long Covid   | Median follow-up (IQR*) | Unadjusted OR† (95% CI**) | Adjusted OR (95% CI) |
|---------|----------|--------------|-------------------------|---------------------------|----------------------|
| Exposed | 356      | 32 (9.0%)    | 101 (91-113)            | 1.27 (1.19-2.47)          | 1.55 (1.07-2.25)     |
| Control | 78,902   | 4,291 (5.4%) | 100 (91-115)            | Reference                 | Reference            |

### Long Covid ≥26 weeks post-infection

| Group   | <i>n</i> | Long Covid   | Median follow-up (IQR) | Unadjusted OR (95% CI) | Adjusted OR (95% CI) |
|---------|----------|--------------|------------------------|------------------------|----------------------|
| Exposed | 326      | 19 (5.8%)    | 312 (271-390)          | 1.44 (0.90-2.29)       | 1.24 (0.77-2.00)     |
| Control | 72,608   | 3,000 (4.1%) | 320 (272-384)          | Reference              | Reference            |

\* IQR=interquartile range

†OR=odds ratio

\*\*CI=confidence interval

## Figures

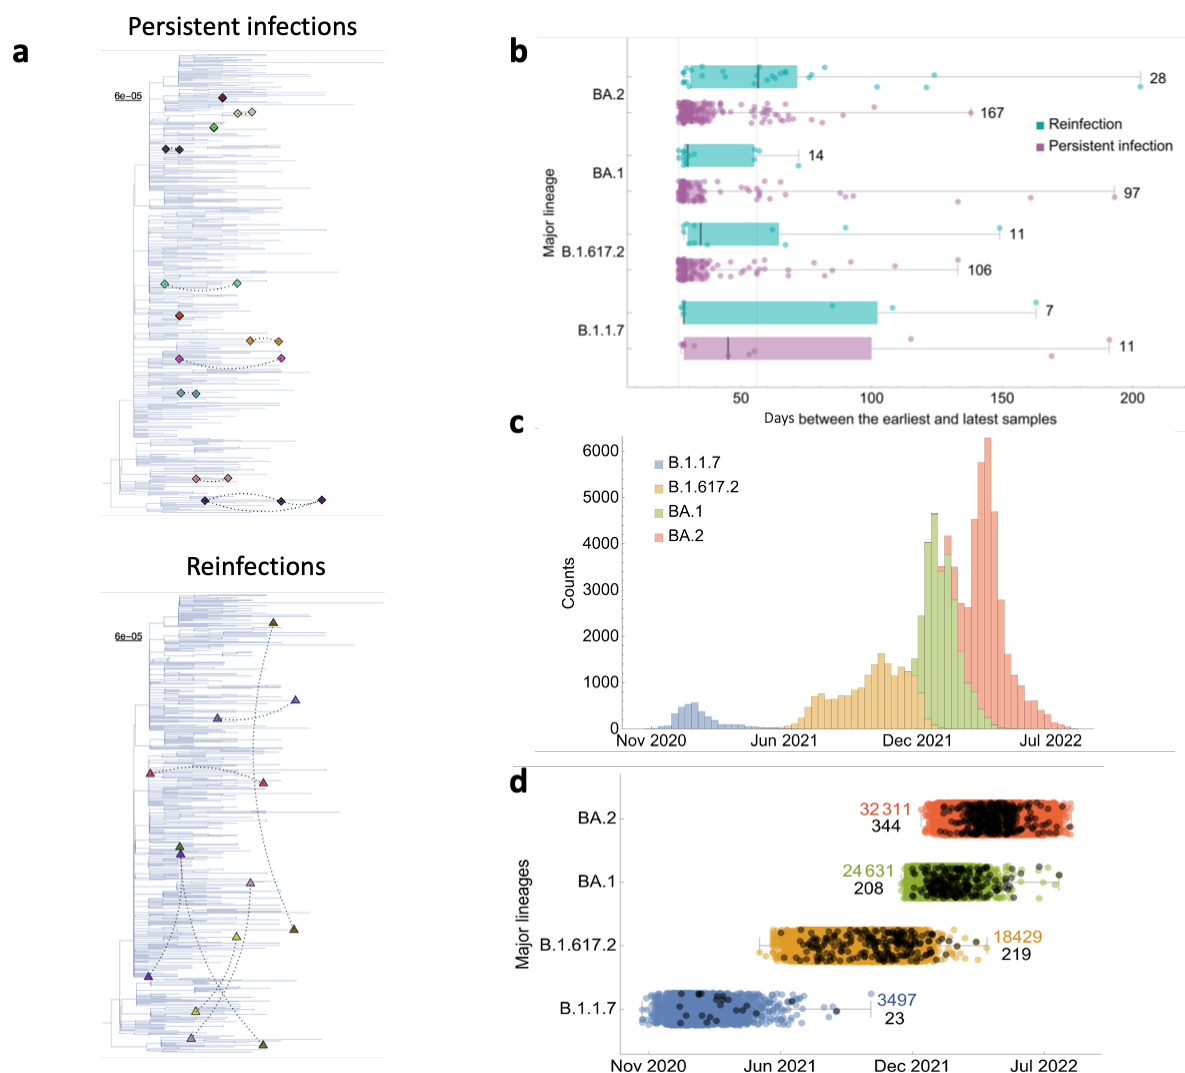

**Figure 1: Individuals identified with persistent infections and reinfections within the ONS-CIS.** (a) Phylogenetic relationship between samples from persistent infections and reinfections with a representative background population of Alpha (see **Supplementary Figure 2** for the analysis on the other three major lineages). Dashed lines connect every pair of sequences from the same individual. Pairs from persistent infections cluster closely together while reinfections do not. All sequences from the same individual are given the same colour. (b) Days between the earliest and latest genomic samples from persistent infections and reinfections. Each point represents a single individual. Solid vertical lines show the 26- and 56-day cutoffs. Numbers on the side of each box shows the total counts per category for each major lineage. (c) Total number of sequences in the ONS-CIS per major lineage over time. (d) Timing of persistent infections (black) during the UK epidemic. Some persistent infections can be identified up to weeks after the lineage has been replaced at the population level. The numbers on the side of each box shows the total sequence counts for each category.

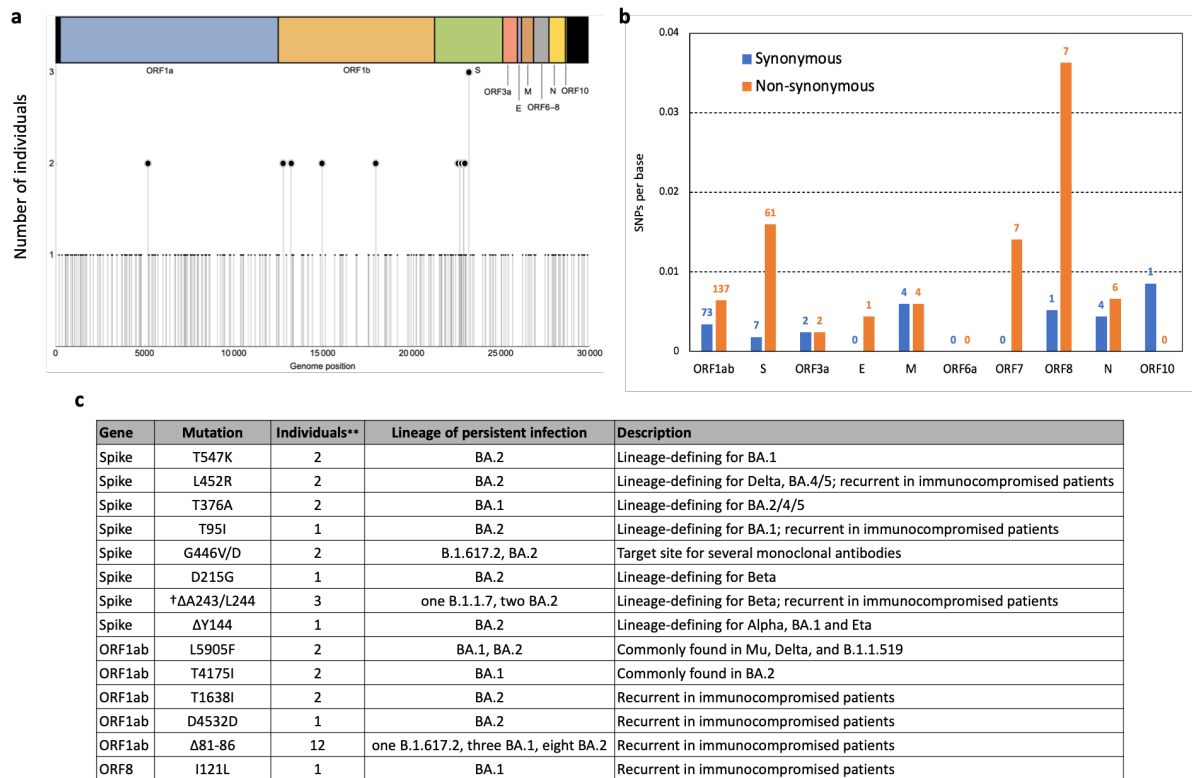

**Figure 2: Distribution of single nucleotide polymorphisms and non-synonymous vs. synonymous mutations detected during persistent infections. (a)** Frequency of mutations that resulted in a SNP change during one or more persistent infections. **(b)** Number of synonymous (blue) and non-synonymous (orange) mutations per gene during persistent infections. Numbers on each column show the total counts of SNPs in each category of mutations. **(c)** Description of recurrent mutations and deletions identified during persistent infections. See **Supplementary Table 1** for information about other mutations.

\*\*None of the recurrent mutations were from households with other infections.

†Δ represents a deletion

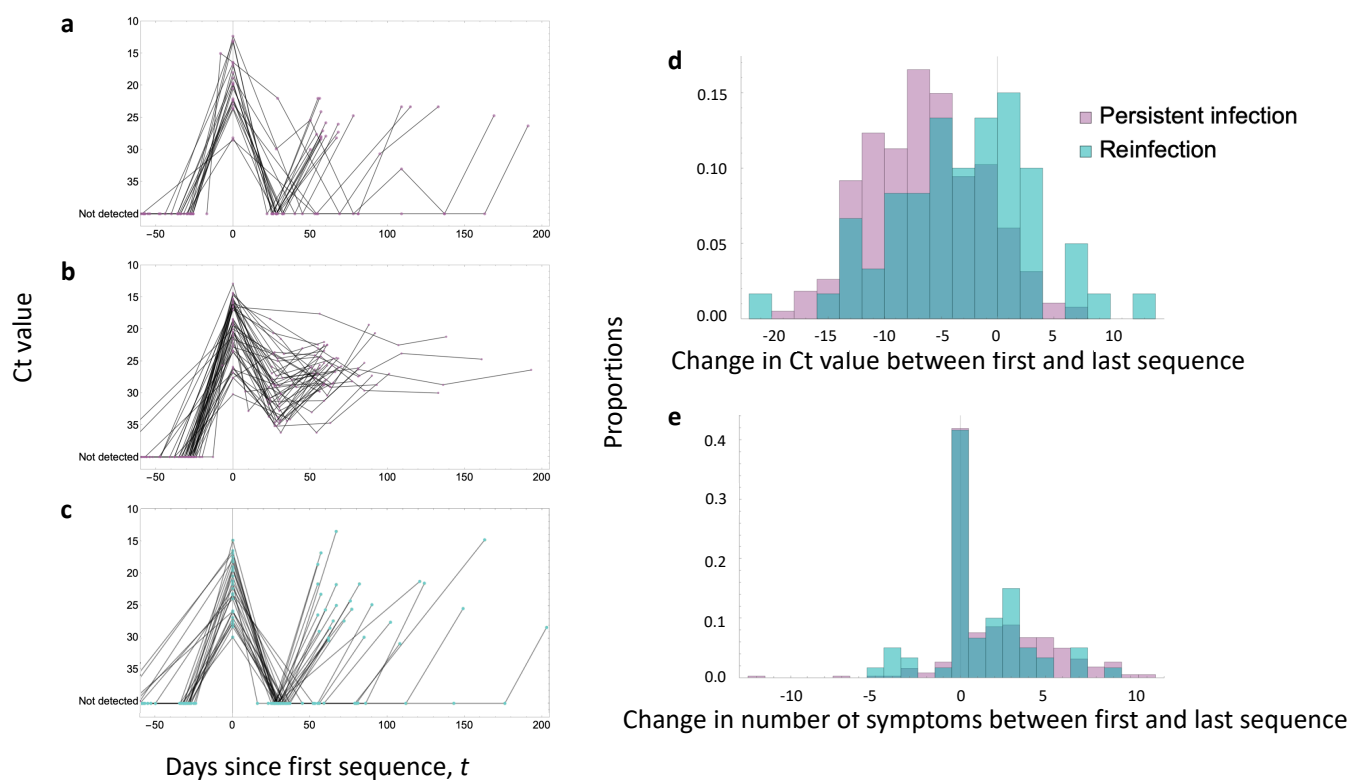

754

755

756

757

758

759

760

761

762

763

764

765

766

767

768

769

770

771

772

773

**Figure 3: Comparison of viral load dynamics and number of reported symptoms during persistent infections and reinfections.** Viral load trajectories of persistent infections with (a) relapsing and (b) chronic persistent infections and (c) reinfections with at least three PCR tests taken over the course of infection/until reinfection. (d) Change in cycle threshold (Ct) value and (e) total number of symptoms reported between the first and last time points with sequenced samples for all 381 persistent infections (purple) and 60 reinfections (cyan). Viral load at the last time point is significantly lower for persistent infections with Ct value being more than +6.7 (IQR: +3.2,+10.2) units higher at the last time point (paired t-test  $p<10^{-8}$ ). The difference is less pronounced for reinfections with +2.5 (IQR: -1.1, +7.4) units difference between primary infection and reinfections (paired t-test  $p=0.0003$ ). Similarly, persistently infected individuals tend to report fewer number of symptoms at the later stages of their infection compared to reinfections in the last 7 days at the last time point (at which a sequence was obtained) when compared to the first. On average, persistently infected individuals report two more symptoms at the time of their first sequenceable sample (virus samples with a positive  $Ct\leq 30$ ) relative to their last sample, with a median of 1 (IQR: 0, 4) fewer reported symptoms (paired Wilcoxon  $p<10^{-29}$ ), while reinfected individuals report only one more symptom at the point of primary infection relative to reinfection, with a median of 0 (IQR: 0, 3) fewer reported symptoms (paired Wilcoxon  $p=0.005$ ).

## Supplementary figures

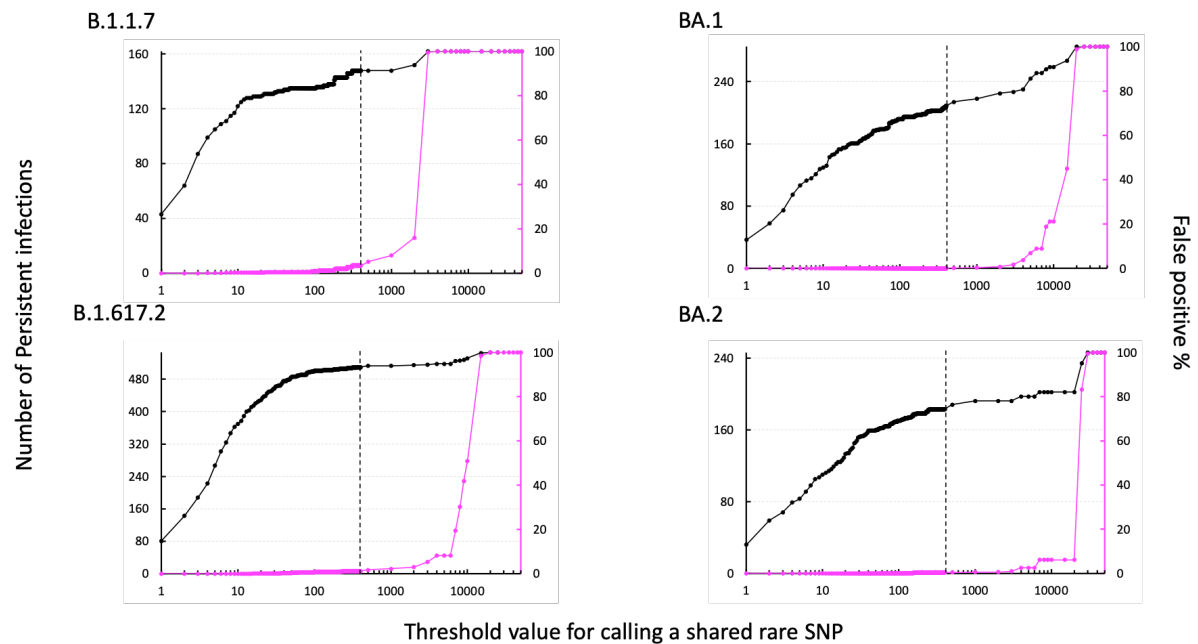

**Supplementary Figure 1: Number of persistent infections identified with a shared rare SNP as a function of the threshold for calling a rare SNP.** Threshold value of 1 for rare SNPs implies the rare SNP is only found in one sequence of that lineage in the ONS-CIS dataset, excluding sequences from any persistently infected individuals. As the threshold value for calling a rare SNP increases, the number of persistent infections (of any duration) identified (black) increases until at some point the threshold value becomes so high that any individual with two or more sequences of the same major lineage would be identified as a persistent infection based on the rare SNP criterion at which point the false positivity rate (magenta) reaches 100%. At threshold value 400 (vertical dashed line) chosen in this study for identifying persistent infections, the percentage of false positives are 0% for BA.1 and BA.2 and 3% for Alpha and Delta.



**a**

Persistent infections

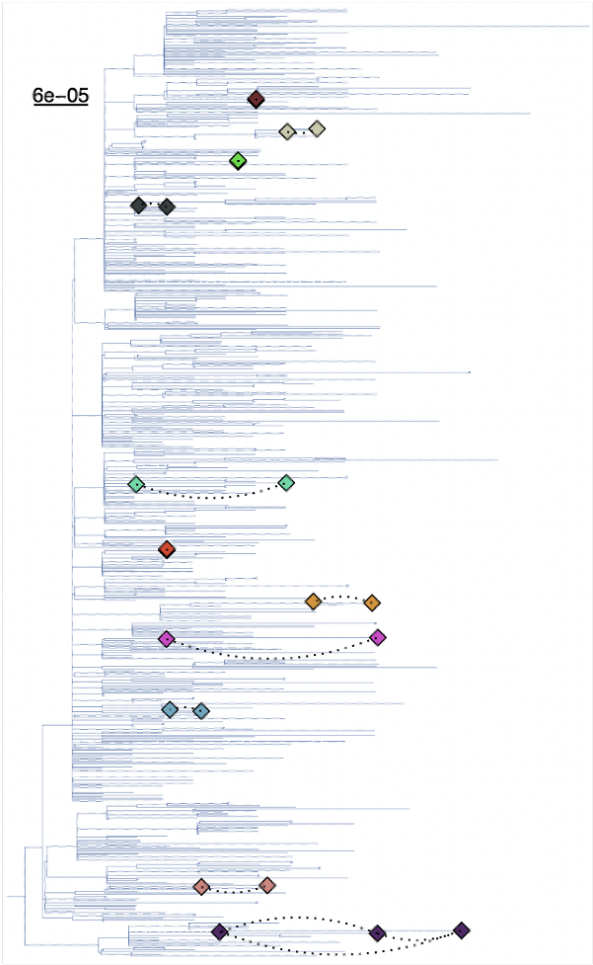

Reinfections

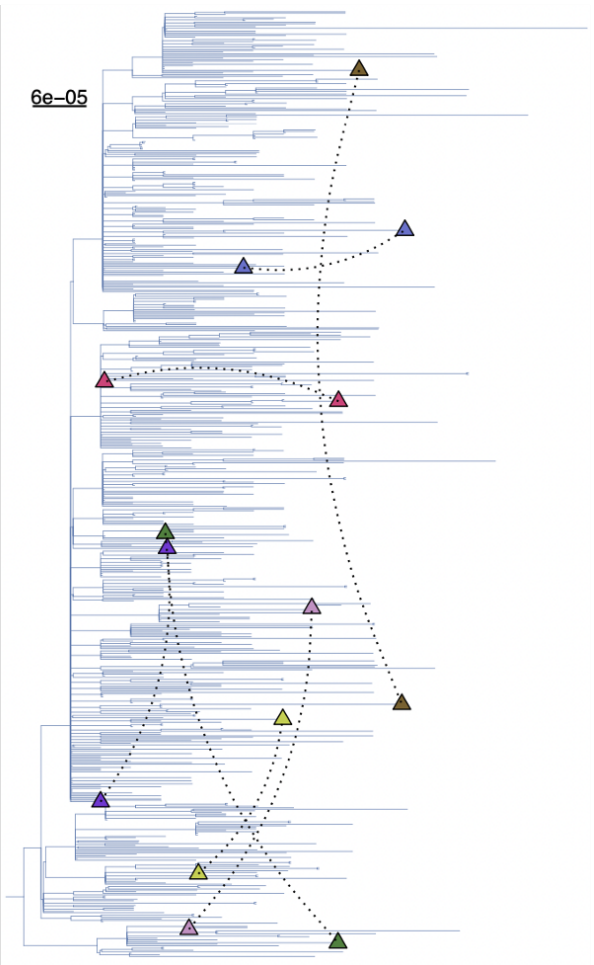

**b**

Persistent infections

Reinfections

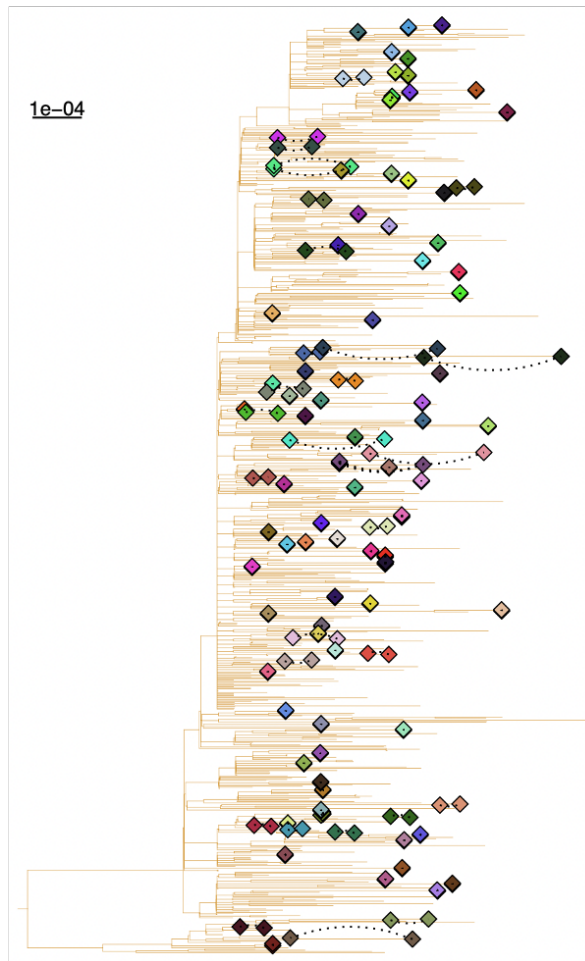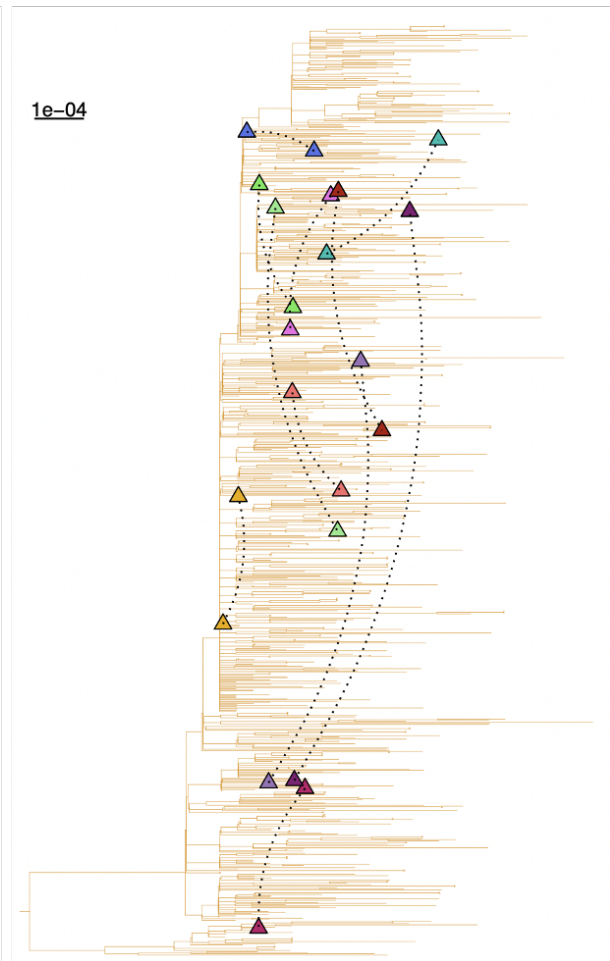

### C Persistent infections

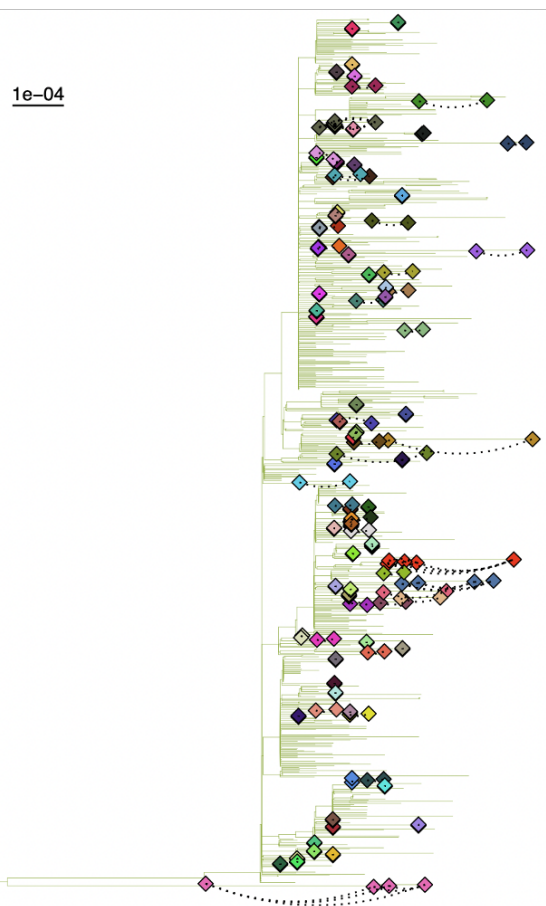

### Reinfections

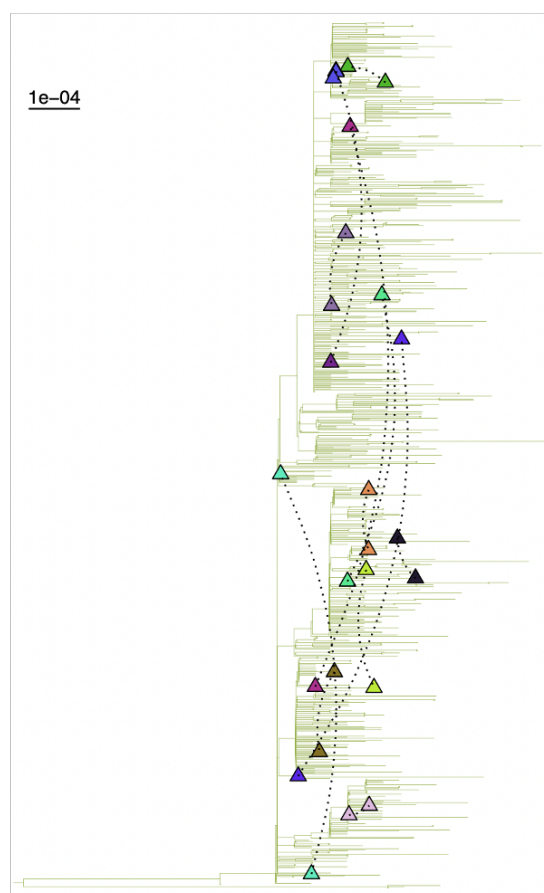

d

Persistent infections

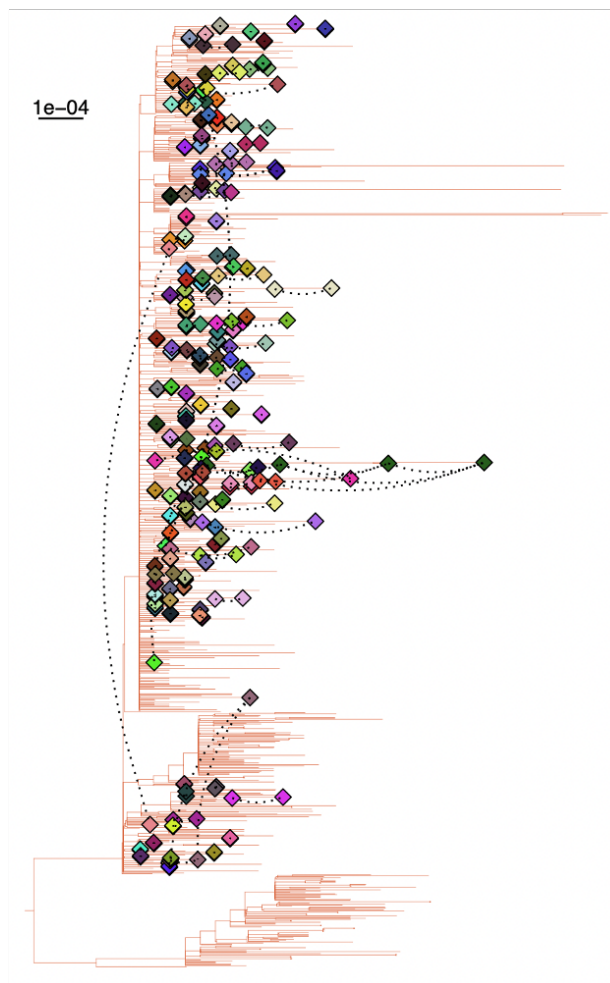

Reinfections

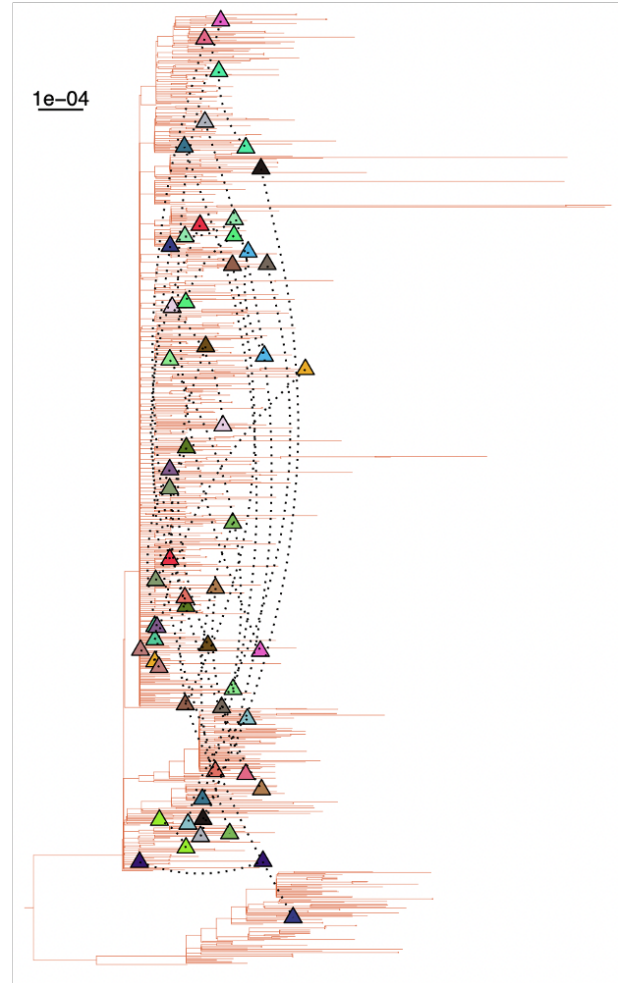

**Supplementary Figure 2: Phylogenetic relationship between samples from persistent infections and a representative background population per major lineage.** Dashed lines connect every pair of sequences from the same individual. All sequences from the same individual are given the same colour. Pairs of sequences for (a) Alpha, (b) Delta, (c) Omicron BA.1, and (d) Omicron BA.2 that belong to persistent infections cluster closely together while reinfections do not. However, some of the sequences in 2 (out of 97) persistent infections with BA.1 and 5 (out of 167) persistent infections with BA.2 have poor bootstrap support ( $<80$ ) and do not cluster together or cluster in a basal sister relationship. In all of these 7 cases, at least one of the sequences from each individual has a Ct value close to 30 with poor coverage. On the other hand, all sequences that belong to the same individual and have strong bootstrap support ( $>80$ ) cluster together.

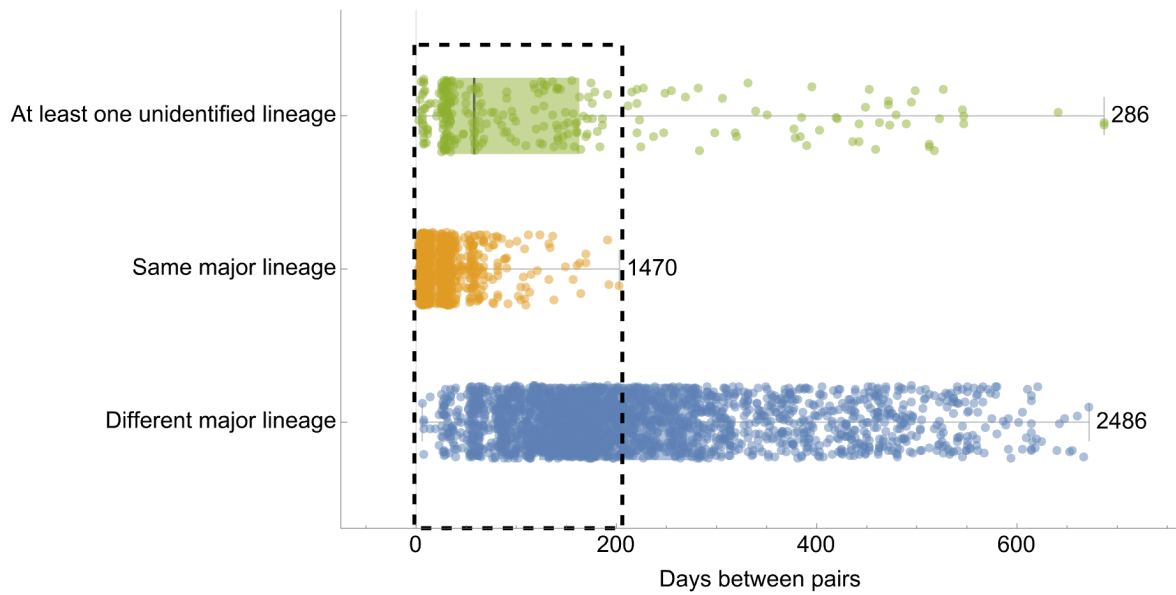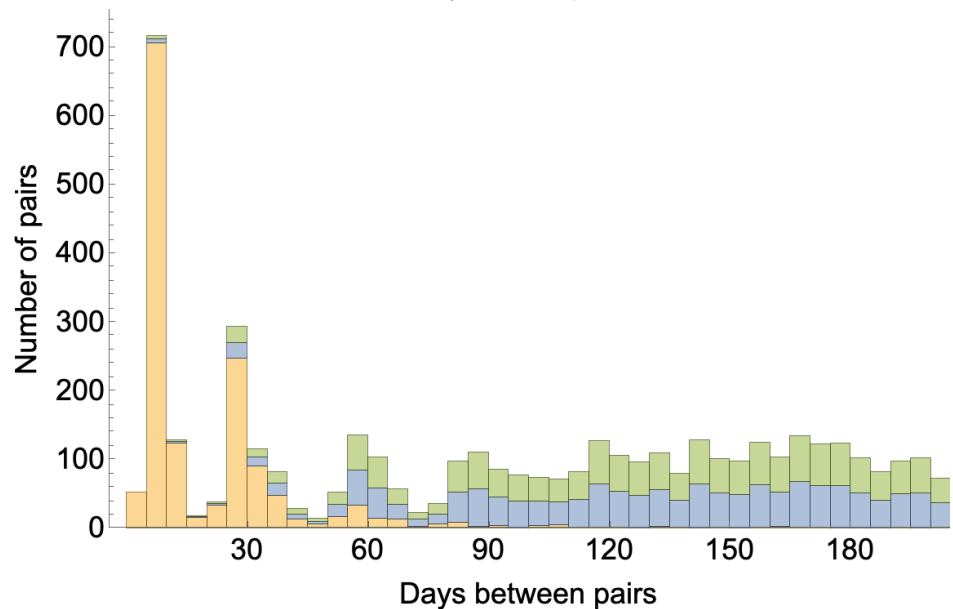

**Supplementary Figure 3: Days between all pairs of sequences from the same individual with two or more sequences.** Pairs of sequences are classified as (i) pairs with at least one unidentified Pango lineage (green), (ii) pairs with identical major lineage (orange), and (iii) pairs from different major lineages. Bottom panel shows the counts of pairs in each of these three categories for the first 200-day time span (highlighted in a dashed rectangle in the top panel). Pairs include all possible combinations of sequences from the same individual. The number of pairs peaks at the 7-, 30-, and 60-day periods due to the sampling frequency of ONS-CIS (see **Methods**). Note that pairs with identical major lineage may not necessarily have identical Pango lineages (see **Methods**).

816

a

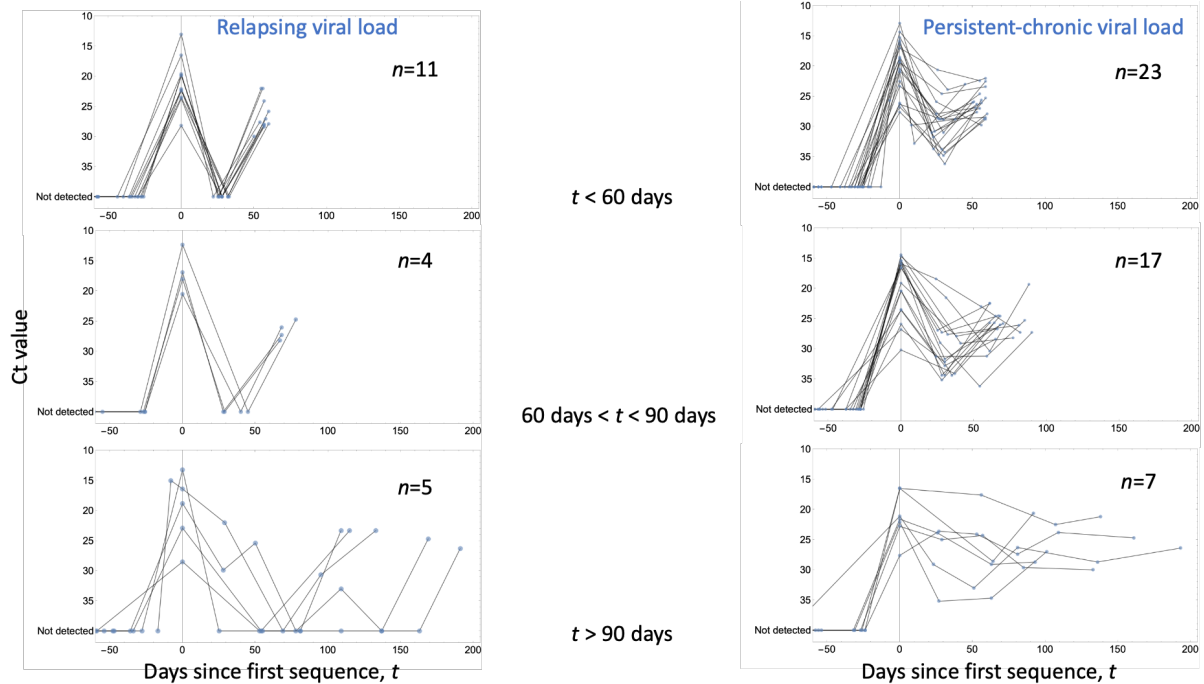

817

818

819

b

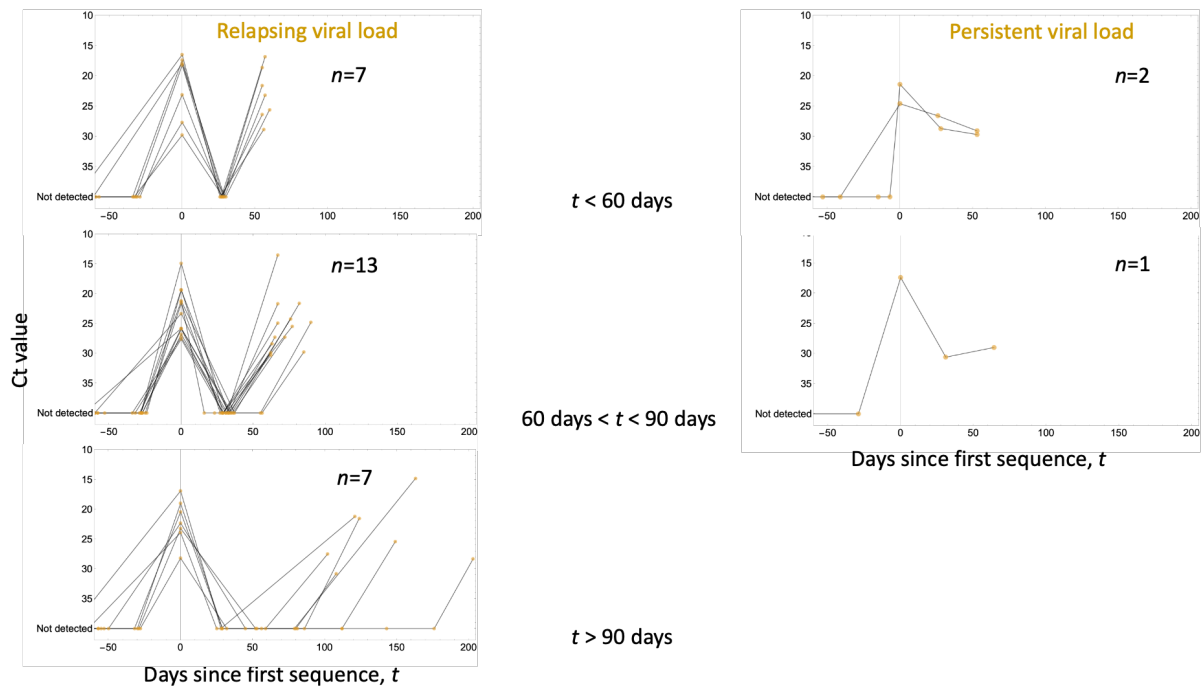

820

821

822

823

824

825

826

827

828

**Supplementary Figure 4: Viral load dynamics of individuals identified with persistent infections and reinfections stratified by duration and viral activity.** Viral load activities of individuals, with 3 or more PCR tests taken during infection/until reinfection, identified as having (a) persistent infections and (b) reinfections with relapsing (left column) and persistent chronic (right column) trajectories. Three reinfections (two occurring in  $< 60$  days and one between 60 to 90 days since first sequence) with persistent chronic viral load dynamics are excluded from the reinfection group as they are deemed potential persistent infections which do not have rare SNPs.



B.1.1.7

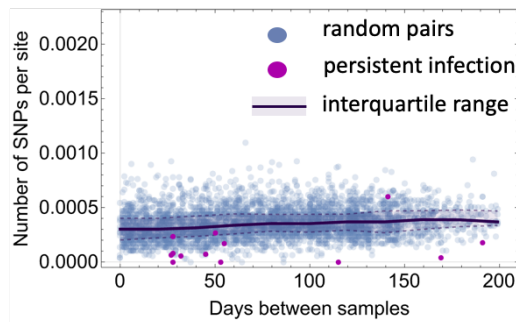

BA.1

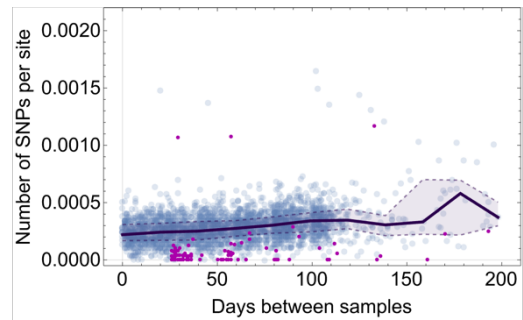

B.1.617.2

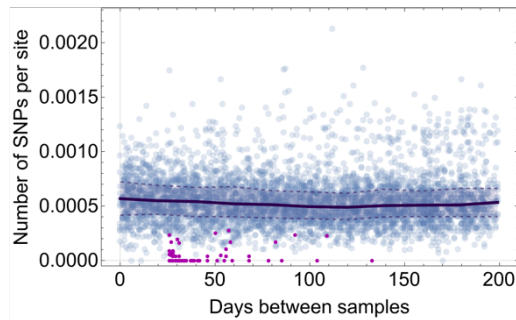

BA.2

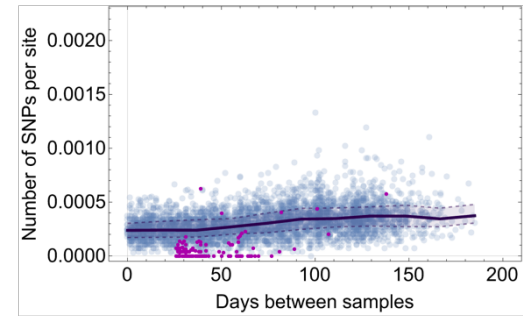

**Supplementary Figure 5: Number of single nucleotide polymorphisms detected in pairs of sequences from persistent infections vs. random pairs from a representative background population.** Number of Single Nucleotide Variants (SNVs) per site between all the sequences collected from persistent infections (purple) and random pairs from individuals with only a single sequence within the ONS-CIS (blue) as a function of the number of days between each pair. For each major lineage, a pool of sequences from individuals with only one sequence within the ONS-CIS was sub-sampled and 500 random pairs generated for every 20 additional days between samples. For some major lineages where there were fewer than 500 pairs available beyond a certain time point, all possible random pairs within that 20-day period are used. Solid line and shaded area show the median and interquartile range, respectively, for random pairs over time. Note that the line and shaded area in each graph does not represent the rate of evolution but can be deemed as a measure of lineage diversity as a function of time difference between samples.

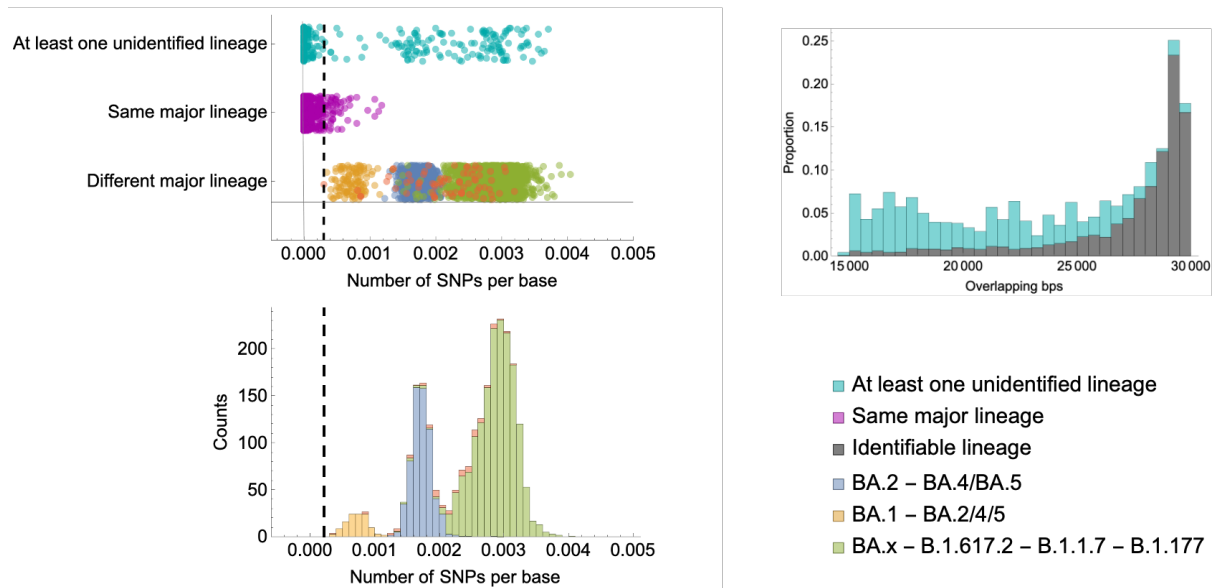

**Supplementary Figure 6: Pairwise differences between sequences from individuals with two or more sequences.** (Left column) Number of single nucleotide polymorphisms (SNPs) between pairs of sequences from each individual with two or more sequences. Pairs include all possible combinations of sequences from the same individual. Vertical dashed line shows the lowest number of SNPs per base for pairs with different major lineages. Any pair with at least one unidentified lineage with a SNP per base smaller than the dashed line is selected as a candidate pair from a persistent infection. Pairs with different major lineages are coloured based on their number of SNPs per base into three groups: (i) pairs with one BA.1 and one BA.2 or BA.4 or BA.5 sequence (orange); (ii) pairs with one BA.2 and one BA.4 or BA.5 sequence (blue); and (iii) pairs with one Omicron (including all BA.x lineages) and one Delta (B.1.617.2), Alpha (B.1.1.7), or B.1.177 sequence (green). (Right column) Proportion of sequences with different number overlapping base pairs. Those with at least one unidentified lineage have a lower number of overlapping base pairs relative to pairs with identifiable lineage (i.e. pairs with identical or different major lineage) mainly due to having lower coverage.



## **The COVID-19 Genomics UK (COG-UK) consortium**

**June 2021 V.1**

Funding acquisition, Leadership and supervision, Metadata curation, Project administration, Samples and logistics, Sequencing and analysis, Software and analysis tools, and Visualisation:

Dr Samuel C Robson PhD <sup>13, 84</sup>

Funding acquisition, Leadership and supervision, Metadata curation, Project administration, Samples and logistics, Sequencing and analysis, and Software and analysis tools:

Dr Thomas R Connor PhD <sup>11, 74</sup> and Prof Nicholas J Loman PhD <sup>43</sup>

Leadership and supervision, Metadata curation, Project administration, Samples and logistics, Sequencing and analysis, Software and analysis tools, and Visualisation:

Dr Tanya Golubchik PhD <sup>5</sup>

Funding acquisition, Leadership and supervision, Metadata curation, Samples and logistics, Sequencing and analysis, and Visualisation:

Dr Rocio T Martinez Nunez PhD <sup>46</sup>

Funding acquisition, Leadership and supervision, Project administration, Samples and logistics, Sequencing and analysis, and Software and analysis tools:

Dr David Bonsall PhD <sup>5</sup>

Funding acquisition, Leadership and supervision, Project administration, Sequencing and analysis, Software and analysis tools, and Visualisation:

Prof Andrew Rambaut DPhil <sup>104</sup>

Funding acquisition, Metadata curation, Project administration, Samples and logistics, Sequencing and analysis, and Software and analysis tools:

Dr Luke B Snell MSc, MBBS <sup>12</sup>

Leadership and supervision, Metadata curation, Project administration, Samples and logistics, Software and analysis tools, and Visualisation:

Rich Livett MSc <sup>116</sup>

Funding acquisition, Leadership and supervision, Metadata curation, Project administration, and Samples and logistics:

Dr Catherine Ludden PhD <sup>20, 70</sup>

Funding acquisition, Leadership and supervision, Metadata curation, Samples and logistics, and Sequencing and analysis:

Dr Sally Corden PhD <sup>74</sup> and Dr Eleni Nastouli FRCPATH <sup>96, 95, 30</sup>

Funding acquisition, Leadership and supervision, Metadata curation, Sequencing and analysis, and Software and analysis tools:

Dr Gaia Nebbia PhD, FRCPATH <sup>12</sup>

909  
910 Funding acquisition, Leadership and supervision, Project administration, Samples and  
911 logistics, and Sequencing and analysis:  
912 Ian Johnston BSc <sup>116</sup>  
913  
914 Leadership and supervision, Metadata curation, Project administration, Samples and  
915 logistics, and Sequencing and analysis:  
916 Prof Katrina Lythgoe PhD <sup>5</sup>, Dr M. Estee Torok FRCP <sup>19, 20</sup> and Prof Ian G Goodfellow PhD <sup>24</sup>  
917 Leadership and supervision, Metadata curation, Project administration, Samples and  
918 logistics, and Visualisation:  
919 Dr Jacqui A Prieto PhD <sup>97, 82</sup> and Dr Kordo Saeed MD, FRCPATH <sup>97, 83</sup>  
920  
921 Leadership and supervision, Metadata curation, Project administration, Sequencing and  
922 analysis, and Software and analysis tools:  
923 Dr David K Jackson PhD <sup>116</sup>  
924  
925 Leadership and supervision, Metadata curation, Samples and logistics, Sequencing and  
926 analysis, and Visualisation:  
927 Dr Catherine Houlihan PhD <sup>96, 94</sup>  
928  
929 Leadership and supervision, Metadata curation, Sequencing and analysis, Software and  
930 analysis tools, and Visualisation:  
931 Dr Dan Frampton PhD <sup>94, 95</sup>  
932  
933 Metadata curation, Project administration, Samples and logistics, Sequencing and analysis,  
934 and Software and analysis tools:  
935 Dr William L Hamilton PhD <sup>19</sup> and Dr Adam A Witney PhD <sup>41</sup>  
936  
937 Funding acquisition, Samples and logistics, Sequencing and analysis, and Visualisation:  
938 Dr Giselda Bucca PhD <sup>101</sup>  
939  
940 Funding acquisition, Leadership and supervision, Metadata curation, and Project  
941 administration:  
942 Dr Cassie F Pope PhD<sup>40, 41</sup>  
943  
944 Funding acquisition, Leadership and supervision, Metadata curation, and Samples and  
945 logistics:  
946 Dr Catherine Moore PhD <sup>74</sup>  
947  
948 Funding acquisition, Leadership and supervision, Metadata curation, and Sequencing and  
949 analysis:  
950 Prof Emma C Thomson PhD, FRCP <sup>53</sup>  
951  
952 Funding acquisition, Leadership and supervision, Project administration, and Samples and  
953 logistics:  
954 Dr Ewan M Harrison PhD <sup>116, 102</sup>  
955  
956 Funding acquisition, Leadership and supervision, Sequencing and analysis, and

957 Visualisation:  
958 Prof Colin P Smith PhD <sup>101</sup>  
959  
960 Leadership and supervision, Metadata curation, Project administration, and Sequencing and  
961 analysis:  
962 Fiona Rogan BSc <sup>77</sup>  
963  
964 Leadership and supervision, Metadata curation, Project administration, and Samples and  
965 logistics:  
966 Shaun M Beckwith MSc <sup>6</sup>, Abigail Murray Degree <sup>6</sup>, Dawn Singleton HNC <sup>6</sup>, Dr Kirstine  
967 Eastick PhD, FRCPath <sup>37</sup>, Dr Liz A Sheridan PhD <sup>98</sup>, Paul Randell MSc, PgD <sup>99</sup>, Dr Leigh M  
968 Jackson PhD <sup>105</sup>, Dr Cristina V Ariani PhD <sup>116</sup> and Dr Sónia Gonçalves PhD <sup>116</sup>  
969  
970 Leadership and supervision, Metadata curation, Samples and logistics, and Sequencing and  
971 analysis:  
972 Dr Derek J Fairley PhD <sup>3, 77</sup>, Prof Matthew W Loose PhD <sup>18</sup> and Joanne Watkins MSc <sup>74</sup>  
973  
974  
975 Leadership and supervision, Metadata curation, Samples and logistics, and Visualisation:  
976 Dr Samuel Moses MD <sup>25, 106</sup>  
977  
978 Leadership and supervision, Metadata curation, Sequencing and analysis, and Software and  
979 analysis tools:  
980 Dr Sam Nicholls PhD <sup>43</sup>, Dr Matthew Bull PhD <sup>74</sup> and Dr Roberto Amato PhD <sup>116</sup>  
981  
982 Leadership and supervision, Project administration, Samples and logistics, and Sequencing  
983 and analysis:  
984 Prof Darren L Smith PhD <sup>36, 65, 66</sup>  
985  
986 Leadership and supervision, Sequencing and analysis, Software and analysis tools, and  
987 Visualisation:  
988 Prof David M Aanensen PhD <sup>14, 116</sup> and Dr Jeffrey C Barrett PhD <sup>116</sup>  
989  
990 Metadata curation, Project administration, Samples and logistics, and Sequencing and  
991 analysis:  
992 Dr Dinesh Aggarwal MRCP<sup>20, 116, 70</sup>, Dr James G Shepherd MBCHB, MRCP <sup>53</sup>, Dr Martin D  
993 Curran PhD <sup>71</sup> and Dr Surendra Parmar PhD <sup>71</sup>  
994  
995 Metadata curation, Project administration, Sequencing and analysis, and Software and  
996 analysis tools:  
997 Dr Matthew D Parker PhD <sup>109</sup>  
998  
999 Metadata curation, Samples and logistics, Sequencing and analysis, and Software and  
1000 analysis tools:  
1001 Dr Catryn Williams PhD <sup>74</sup>  
1002  
1003 Metadata curation, Samples and logistics, Sequencing and analysis, and Visualisation:  
1004 Dr Sharon Glaysher PhD <sup>68</sup>

1005

1006 Metadata curation, Sequencing and analysis, Software and analysis tools, and Visualisation:

1007 Dr Anthony P Underwood PhD <sup>14, 116</sup>, Dr Matthew Bashton PhD <sup>36, 65</sup>, Dr Nicole Pacchiarini

1008 PhD <sup>74</sup>, Dr Katie F Loveson PhD <sup>84</sup> and Matthew Byott MSc <sup>95, 96</sup>

1009

1010 Project administration, Sequencing and analysis, Software and analysis tools, and

1011 Visualisation:

1012 Dr Alessandro M Carabelli PhD <sup>20</sup>

1013

1014 Funding acquisition, Leadership and supervision, and Metadata curation:

1015 Dr Kate E Templeton PhD <sup>56, 104</sup>

1016

1017 Funding acquisition, Leadership and supervision, and Project administration:

1018 Dr Thushan I de Silva PhD <sup>109</sup>, Dr Dennis Wang PhD <sup>109</sup>, Dr Cordelia F Langford PhD <sup>116</sup> and

1019 John Sillitoe BEng <sup>116</sup>

1020

1021 Funding acquisition, Leadership and supervision, and Samples and logistics:

1022 Prof Rory N Gunson PhD, FRCPATH <sup>55</sup>

1023

1024 Funding acquisition, Leadership and supervision, and Sequencing and analysis:

1025 Dr Simon Cottrell PhD <sup>74</sup>, Dr Justin O'Grady PhD <sup>75, 103</sup> and Prof Dominic Kwiatkowski PhD

1026 <sup>116, 108</sup>

1027

1028 Leadership and supervision, Metadata curation, and Project administration:

1029 Dr Patrick J Lillie PhD, FRCP <sup>37</sup>

1030

1031 Leadership and supervision, Metadata curation, and Samples and logistics:

1032 Dr Nicholas Cortes MBCHB <sup>33</sup>, Dr Nathan Moore MBCHB <sup>33</sup>, Dr Claire Thomas DPhil <sup>33</sup>,

1033 Phillipa J Burns MSc, DipRCPATH <sup>37</sup>, Dr Tabitha W Mahungu FRCPATH <sup>80</sup> and Steven Liggett

1034 BSc <sup>86</sup>

1035

1036 Leadership and supervision, Metadata curation, and Sequencing and analysis:

1037 Angela H Beckett MSc <sup>13, 81</sup> and Prof Matthew TG Holden PhD <sup>73</sup>

1038

1039 Leadership and supervision, Project administration, and Samples and logistics:

1040 Dr Lisa J Levett PhD <sup>34</sup>, Dr Husam Osman PhD <sup>70, 35</sup> and Dr Mohammed O Hassan-Ibrahim

1041 PhD, FRCPATH <sup>99</sup>

1042

1043 Leadership and supervision, Project administration, and Sequencing and analysis:

1044 Dr David A Simpson PhD <sup>77</sup>

1045

1046 Leadership and supervision, Samples and logistics, and Sequencing and analysis:

1047 Dr Meera Chand PhD <sup>72</sup>, Prof Ravi K Gupta PhD <sup>102</sup>, Prof Alistair C Darby PhD <sup>107</sup> and Prof

1048 Steve Paterson PhD <sup>107</sup>

1049

1050 Leadership and supervision, Sequencing and analysis, and Software and analysis tools:

1051 Prof Oliver G Pybus DPhil <sup>23</sup>, Dr Erik M Volz PhD <sup>39</sup>, Prof Daniela de Angelis PhD <sup>52</sup>, Prof

1052 David L Robertson PhD <sup>53</sup>, Dr Andrew J Page PhD <sup>75</sup> and Dr Inigo Martincorena PhD <sup>116</sup>

1053

1054 Leadership and supervision, Sequencing and analysis, and Visualisation:

1055 Dr Louise Aigrain PhD <sup>116</sup> and Dr Andrew R Bassett PhD <sup>116</sup>

1056

1057 Metadata curation, Project administration, and Samples and logistics:

1058 Dr Nick Wong DPhil, MRCP, FRCPath <sup>50</sup>, Dr Yusri Taha MD, PhD <sup>89</sup>, Michelle J Erkiert BA <sup>99</sup>

1059 and Dr Michael H Spencer Chapman MBBS <sup>116, 102</sup>

1060

1061 Metadata curation, Project administration, and Sequencing and analysis:

1062 Dr Rebecca Dewar PhD <sup>56</sup> and Martin P McHugh MSc <sup>56, 111</sup>

1063

1064 Metadata curation, Project administration, and Software and analysis tools:

1065 Siddharth Mookerjee MPH <sup>38, 57</sup>

1066

1067 Metadata curation, Project administration, and Visualisation:

1068 Stephen Aplin <sup>97</sup>, Matthew Harvey <sup>97</sup>, Thea Sass <sup>97</sup>, Dr Helen Umpleby FRCP <sup>97</sup> and Helen

1069 Wheeler <sup>97</sup>

1070

1071 Metadata curation, Samples and logistics, and Sequencing and analysis:

1072 Dr James P McKenna PhD <sup>3</sup>, Dr Ben Warne MRCP <sup>9</sup>, Joshua F Taylor MSc <sup>22</sup>, Yasmin

1073 Chaudhry BSc <sup>24</sup>, Rhys Izuagbe <sup>24</sup>, Dr Aminu S Jahun PhD <sup>24</sup>, Dr Gregory R Young PhD <sup>36,</sup>

1074 <sup>65</sup>, Dr Claire McMurray PhD <sup>43</sup>, Dr Clare M McCann PhD <sup>65, 66</sup>, Dr Andrew Nelson PhD <sup>65, 66</sup>

1075 and Scott Elliott <sup>68</sup>

1076

1077 Metadata curation, Samples and logistics, and Visualisation:

1078 Hannah Lowe MSc <sup>25</sup>

1079

1080 Metadata curation, Sequencing and analysis, and Software and analysis tools:

1081 Dr Anna Price PhD <sup>11</sup>, Matthew R Crown BSc <sup>65</sup>, Dr Sara Rey PhD <sup>74</sup>, Dr Sunando Roy PhD

1082 <sup>96</sup> and Dr Ben Temperton PhD <sup>105</sup>

1083

1084

1085 Metadata curation, Sequencing and analysis, and Visualisation:

1086 Dr Sharif Shaaban PhD <sup>73</sup> and Dr Andrew R Hesketh PhD <sup>101</sup>

1087

1088 Project administration, Samples and logistics, and Sequencing and analysis:

1089 Dr Kenneth G Laing PhD<sup>41</sup>, Dr Irene M Monahan PhD <sup>41</sup> and Dr Judith Heaney PhD <sup>95, 96, 34</sup>

1090

1091 Project administration, Samples and logistics, and Visualisation:

1092 Dr Emanuela Pelosi FRCPath <sup>97</sup>, Siona Silveira MSc <sup>97</sup> and Dr Eleri Wilson-Davies MD,

1093 FRCPath <sup>97</sup>

1094

1095 Samples and logistics, Software and analysis tools, and Visualisation:

1096 Dr Helen Fryer PhD <sup>5</sup>

1097

1098 Sequencing and analysis, Software and analysis tools, and Visualization:

1099 Dr Helen Adams PhD <sup>4</sup>, Dr Louis du Plessis PhD <sup>23</sup>, Dr Rob Johnson PhD <sup>39</sup>, Dr William T

1100 Harvey PhD <sup>53, 42</sup>, Dr Joseph Hughes PhD <sup>53</sup>, Dr Richard J Orton PhD <sup>53</sup>, Dr Lewis G Spurgin

1101 PhD <sup>59</sup>, Dr Yann Bourgeois PhD <sup>81</sup>, Dr Chris Ruis PhD <sup>102</sup>, Áine O'Toole MSc <sup>104</sup>, Marina  
 1102 Gourtovaia MSc <sup>116</sup> and Dr Theo Sanderson PhD <sup>116</sup>  
 1103  
 1104 Funding acquisition, and Leadership and supervision:  
 1105 Dr Christophe Fraser PhD <sup>5</sup>, Dr Jonathan Edgeworth PhD, FRCPATH <sup>12</sup>, Prof Judith Breuer  
 1106 MD <sup>96, 29</sup>, Dr Stephen L Michell PhD <sup>105</sup> and Prof John A Todd PhD <sup>115</sup>  
 1107  
 1108 Funding acquisition, and Project administration:  
 1109 Michaela John BSc <sup>10</sup> and Dr David Buck PhD <sup>115</sup>  
 1110  
 1111 Leadership and supervision, and Metadata curation:  
 1112 Dr Kavitha Gajee MBBS, FRCPATH <sup>37</sup> and Dr Gemma L Kay PhD <sup>75</sup>  
 1113  
 1114 Leadership and supervision, and Project administration:  
 1115 Prof Sharon J Peacock PhD <sup>20, 70</sup> and David Heyburn <sup>74</sup>  
 1116  
 1117 Leadership and supervision, and Samples and logistics:  
 1118 Katie Kitchman BSc <sup>37</sup>, Prof Alan McNally PhD <sup>43, 93</sup>, David T Pritchard MSc, CSci <sup>50</sup>, Dr  
 1119 Samir Dervisevic FRCPATH <sup>58</sup>, Dr Peter Muir PhD <sup>70</sup>, Dr Esther Robinson PhD <sup>70, 35</sup>, Dr Barry  
 1120 B Vipond PhD <sup>70</sup>, Newara A Ramadan MSc, CSci, FIBMS <sup>78</sup>, Dr Christopher Jeanes MBBS  
 1121 <sup>90</sup>, Danni Weldon BSc <sup>116</sup>, Jana Catalan MSc <sup>118</sup> and Neil Jones MSc <sup>118</sup>  
 1122  
 1123 Leadership and supervision, and Sequencing and analysis:  
 1124 Dr Ana da Silva Filipe PhD <sup>53</sup>, Dr Chris Williams MBBS <sup>74</sup>, Marc Fuchs BSc <sup>77</sup>, Dr Julia  
 1125 Miskelly PhD <sup>77</sup>, Dr Aaron R Jeffries PhD <sup>105</sup>, Karen Oliver BSc <sup>116</sup> and Dr Naomi R Park PhD  
 1126 <sup>116</sup>  
 1127  
 1128 Metadata curation, and Samples and logistics:  
 1129 Amy Ash BSc <sup>1</sup>, Cherian Koshy MSc, CSci, FIBMS <sup>1</sup>, Magdalena Barrow <sup>7</sup>, Dr Sarah L  
 1130 Buchan PhD <sup>7</sup>, Dr Anna Mantzouratou PhD <sup>7</sup>, Dr Gemma Clark PhD <sup>15</sup>, Dr Christopher W  
 1131 Holmes PhD <sup>16</sup>, Sharon Campbell MSc <sup>17</sup>, Thomas Davis MSc <sup>21</sup>, Ngee Keong Tan MSc <sup>22</sup>,  
 1132 Dr Julianne R Brown PhD <sup>29</sup>, Dr Kathryn A Harris PhD <sup>29, 2</sup>, Stephen P Kidd MSc <sup>33</sup>, Dr Paul  
 1133 R Grant PhD <sup>34</sup>, Dr Li Xu-McCrae PhD <sup>35</sup>, Dr Alison Cox PhD <sup>38, 63</sup>, Pinglawathee Madona  
 1134 <sup>38, 63</sup>, Dr Marcus Pond PhD <sup>38, 63</sup>, Dr Paul A Randell MBCh <sup>38, 63</sup>, Karen T Withell FIBMS <sup>48</sup>,  
 1135 Cheryl Williams MSc <sup>51</sup>, Dr Clive Graham MD <sup>60</sup>, Rebecca Denton-Smith BSc <sup>62</sup>, Emma  
 1136 Swindells BSc <sup>62</sup>, Robyn Turnbull BSc <sup>62</sup>, Dr Tim J Sloan PhD <sup>67</sup>, Dr Andrew Bosworth PhD  
 1137 <sup>70, 35</sup>, Stephanie Hutchings <sup>70</sup>, Hannah M Pymont MSc <sup>70</sup>, Dr Anna Casey PhD <sup>76</sup>, Dr Liz  
 1138 Ratcliffe PhD <sup>76</sup>, Dr Christopher R Jones PhD <sup>79, 105</sup>, Dr Bridget A Knight PhD <sup>79, 105</sup>, Dr  
 1139 Tanzina Haque PhD, FRCPATH <sup>80</sup>, Dr Jennifer Hart MRCP <sup>80</sup>, Dr Dianne Irish-Tavares  
 1140 FRCPATH <sup>80</sup>, Eric Witele MSc <sup>80</sup>, Craig Mower BA <sup>86</sup>, Louisa K Watson DipHE <sup>86</sup>, Jennifer  
 1141 Collins BSc <sup>89</sup>, Gary Eltringham BSc <sup>89</sup>, Dorian Crudgington <sup>98</sup>, Ben Macklin <sup>98</sup>, Prof Miren  
 1142 Iturriza-Gomara PhD <sup>107</sup>, Dr Anita O Lucaci PhD <sup>107</sup> and Dr Patrick C McClure PhD <sup>113</sup>  
 1143  
 1144 Metadata curation, and Sequencing and analysis:  
 1145 Matthew Carlile BSc <sup>18</sup>, Dr Nadine Holmes PhD <sup>18</sup>, Dr Christopher Moore PhD <sup>18</sup>, Dr  
 1146 Nathaniel Storey PhD <sup>29</sup>, Dr Stefan Rooke PhD <sup>73</sup>, Dr Gonzalo Yebra PhD <sup>73</sup>, Dr Noel Craine  
 1147 DPhil <sup>74</sup>, Malorie Perry MSc <sup>74</sup>, Dr Nabil-Fareed Alikhan PhD <sup>75</sup>, Dr Stephen Bridgett PhD <sup>77</sup>,  
 1148 Kate F Cook MScR <sup>84</sup>, Christopher Fearn MSc <sup>84</sup>, Dr Salman Goudarzi PhD <sup>84</sup>, Prof Ronan A

1149 Lyons MD <sup>88</sup>, Dr Thomas Williams MD <sup>104</sup>, Dr Sam T Haldenby PhD <sup>107</sup>, Jillian Durham BSc  
 1150 <sup>116</sup> and Dr Steven Leonard PhD <sup>116</sup>  
 1151  
 1152 Metadata curation, and Software and analysis tools:  
 1153 Robert M Davies MA (Cantab) <sup>116</sup>  
 1154  
 1155 Project administration, and Samples and logistics:  
 1156 Dr Rahul Batra MD <sup>12</sup>, Beth Blane BSc <sup>20</sup>, Dr Moira J Spyer PhD <sup>30, 95, 96</sup>, Perminder Smith  
 1157 MSc <sup>32, 112</sup>, Mehmet Yavus <sup>85, 109</sup>, Dr Rachel J Williams PhD <sup>96</sup>, Dr Adhyana IK Mahanama  
 1158 MD <sup>97</sup>, Dr Buddhini Samaraweera MD <sup>97</sup>, Sophia T Girgis MSc <sup>102</sup>, Samantha E Hansford  
 1159 CSci <sup>109</sup>, Dr Angie Green PhD <sup>115</sup>, Dr Charlotte Beaver PhD <sup>116</sup>, Katherine L Bellis <sup>116, 102</sup>,  
 1160 Matthew J Dorman <sup>116</sup>, Sally Kay <sup>116</sup>, Liam Prestwood <sup>116</sup> and Dr Shavanthi Rajatileka PhD  
 1161 <sup>116</sup>  
 1162  
 1163 Project administration, and Sequencing and analysis:  
 1164 Dr Joshua Quick PhD <sup>43</sup>  
 1165  
 1166 Project administration, and Software and analysis tools:  
 1167 Radoslaw Poplawski BSc <sup>43</sup>  
 1168  
 1169 Samples and logistics, and Sequencing and analysis:  
 1170 Dr Nicola Reynolds PhD <sup>8</sup>, Andrew Mack MPhil <sup>11</sup>, Dr Arthur Morriss PhD <sup>11</sup>, Thomas  
 1171 Whalley BSc <sup>11</sup>, Bindi Patel BSc <sup>12</sup>, Dr Iliana Georgana PhD <sup>24</sup>, Dr Myra Hosmillo PhD <sup>24</sup>,  
 1172 Malte L Pinckert MPhil <sup>24</sup>, Dr Joanne Stockton PhD <sup>43</sup>, Dr John H Henderson PhD <sup>65</sup>, Amy  
 1173 Hollis HND <sup>65</sup>, Dr William Stanley PhD <sup>65</sup>, Dr Wen C Yew PhD <sup>65</sup>, Dr Richard Myers PhD <sup>72</sup>,  
 1174 Dr Alicia Thornton PhD <sup>72</sup>, Alexander Adams BSc <sup>74</sup>, Tara Annett BSc <sup>74</sup>, Dr Hibo Asad PhD  
 1175 <sup>74</sup>, Alec Birchley MSc <sup>74</sup>, Jason Coombes BSc <sup>74</sup>, Johnathan M Evans MSc <sup>74</sup>, Laia Fina <sup>74</sup>,  
 1176 Bree Gatica-Wilcox MPhil <sup>74</sup>, Lauren Gilbert <sup>74</sup>, Lee Graham BSc <sup>74</sup>, Jessica Hey BSc <sup>74</sup>,  
 1177 Ember Hilvers MPH <sup>74</sup>, Sophie Jones MSc <sup>74</sup>, Hannah Jones <sup>74</sup>, Sara Kumziene-  
 1178 Summerhayes MSc <sup>74</sup>, Dr Caoimhe McKerr PhD <sup>74</sup>, Jessica Powell BSc <sup>74</sup>, Georgia Pugh <sup>74</sup>,  
 1179 Sarah Taylor <sup>74</sup>, Alexander J Trotter MRes <sup>75</sup>, Charlotte A Williams BSc <sup>96</sup>, Leanne M  
 1180 Kermack MSc <sup>102</sup>, Benjamin H Foulkes MSc <sup>109</sup>, Marta Gallis MSc <sup>109</sup>, Hailey R Hornsby MSc  
 1181 <sup>109</sup>, Stavroula F Louka MSc <sup>109</sup>, Dr Manoj Pohare PhD <sup>109</sup>, Paige Wolverson MSc <sup>109</sup>, Peijun  
 1182 Zhang MSc <sup>109</sup>, George MacIntyre-Cockett BSc <sup>115</sup>, Amy Trebes MSc <sup>115</sup>, Dr Robin J Moll  
 1183 PhD <sup>116</sup>, Lynne Ferguson MSc <sup>117</sup>, Dr Emily J Goldstein PhD <sup>117</sup>, Dr Alasdair Maclean PhD <sup>117</sup>  
 1184 and Dr Rachael Tomb PhD <sup>117</sup>  
 1185  
 1186 Samples and logistics, and Software and analysis tools:  
 1187 Dr Igor Starinskij MSc, MRCP <sup>53</sup>  
 1188  
 1189 Sequencing and analysis, and Software and analysis tools:  
 1190 Laura Thomson BSc <sup>5</sup>, Joel Southgate MSc <sup>11, 74</sup>, Dr Moritz UG Kraemer DPhil <sup>23</sup>, Dr Jayna  
 1191 Raghwanthi PhD <sup>23</sup>, Dr Alex E Zarebski PhD <sup>23</sup>, Olivia Boyd MSc <sup>39</sup>, Lily Geidelberg MSc <sup>39</sup>, Dr  
 1192 Chris J Illingworth PhD <sup>52</sup>, Dr Chris Jackson PhD <sup>52</sup>, Dr David Pascall PhD <sup>52</sup>, Dr Sreenu  
 1193 Vattipally PhD <sup>53</sup>, Timothy M Freeman MPhil <sup>109</sup>, Dr Sharon N Hsu PhD <sup>109</sup>, Dr Benjamin B  
 1194 Lindsey MRCP <sup>109</sup>, Dr Keith James PhD <sup>116</sup>, Kevin Lewis <sup>116</sup>, Gerry Tonkin-Hill <sup>116</sup> and Dr  
 1195 Jaime M Tovar-Corona PhD <sup>116</sup>  
 1196

1197 Sequencing and analysis, and Visualisation:  
1198 MacGregor Cox MSci <sup>20</sup>  
1199  
1200 Software and analysis tools, and Visualisation:  
1201 Dr Khalil Abudahab PhD <sup>14, 116</sup>, Mirko Menegazzo <sup>14</sup>, Ben EW Taylor MEng <sup>14, 116</sup>, Dr Corin A  
1202 Yeats PhD <sup>14</sup>, Afrida Mukaddas BTech <sup>53</sup>, Derek W Wright MSc <sup>53</sup>, Dr Leonardo de Oliveira  
1203 Martins PhD <sup>75</sup>, Dr Rachel Colquhoun DPhil <sup>104</sup>, Verity Hill <sup>104</sup>, Dr Ben Jackson PhD <sup>104</sup>, Dr JT  
1204 McCrone PhD <sup>104</sup>, Dr Nathan Medd PhD <sup>104</sup>, Dr Emily Scher PhD <sup>104</sup> and Jon-Paul Keatley <sup>116</sup>  
1205  
1206 Leadership and supervision:  
1207 Dr Tanya Curran PhD <sup>3</sup>, Dr Sian Morgan FRCPATH <sup>10</sup>, Prof Patrick Maxwell PhD <sup>20</sup>, Prof Ken  
1208 Smith PhD <sup>20</sup>, Dr Sahar Eldirdiri MBBS, MSc, FRCPATH <sup>21</sup>, Anita Kenyon MSc <sup>21</sup>, Prof Alison  
1209 H Holmes MD <sup>38, 57</sup>, Dr James R Price PhD <sup>38, 57</sup>, Dr Tim Wyatt PhD <sup>69</sup>, Dr Alison E Mather  
1210 PhD <sup>75</sup>, Dr Timofey Skvortsov PhD <sup>77</sup> and Prof John A Hartley PhD <sup>96</sup>  
1211  
1212 Metadata curation:  
1213 Prof Martyn Guest PhD <sup>11</sup>, Dr Christine Kitchen PhD <sup>11</sup>, Dr Ian Merrick PhD <sup>11</sup>, Robert Munn  
1214 BSc <sup>11</sup>, Dr Beatrice Bertolusso Degree <sup>33</sup>, Dr Jessica Lynch MBCHB <sup>33</sup>, Dr Gabrielle Vernet  
1215 MBBS <sup>33</sup>, Stuart Kirk MSc <sup>34</sup>, Dr Elizabeth Wastnedge MD <sup>56</sup>, Dr Rachael Stanley PhD <sup>58</sup>,  
1216 Giles Idle <sup>64</sup>, Dr Declan T Bradley PhD <sup>69, 77</sup>, Dr Jennifer Poyner MD <sup>79</sup> and Matilde Mori BSc  
1217 <sup>110</sup>  
1218  
1219 Project administration:  
1220 Owen Jones BSc <sup>11</sup>, Victoria Wright BSc <sup>18</sup>, Ellena Brooks MA <sup>20</sup>, Carol M Churcher BSc <sup>20</sup>,  
1221 Mireille Fragakis HND <sup>20</sup>, Dr Katerina Galai PhD <sup>20, 70</sup>, Dr Andrew Jermy PhD <sup>20</sup>, Sarah  
1222 Judges BA <sup>20</sup>, Georgina M McManus BSc <sup>20</sup>, Kim S Smith <sup>20</sup>, Dr Elaine Westwick PhD <sup>20</sup>, Dr  
1223 Stephen W Attwood PhD <sup>23</sup>, Dr Frances Bolt PhD <sup>38, 57</sup>, Dr Alisha Davies PhD <sup>74</sup>, Elen De  
1224 Lacy MPH <sup>74</sup>, Fatima Downing <sup>74</sup>, Sue Edwards <sup>74</sup>, Lizzie Meadows MA <sup>75</sup>, Sarah Jeremiah  
1225 MSc <sup>97</sup>, Dr Nikki Smith PhD <sup>109</sup> and Luke Foulser <sup>116</sup>  
1226  
1227 Samples and logistics:  
1228 Dr Themoula Charalampous PhD <sup>12, 46</sup>, Amita Patel BSc <sup>12</sup>, Dr Louise Berry PhD <sup>15</sup>, Dr Tim  
1229 Boswell PhD <sup>15</sup>, Dr Vicki M Fleming PhD <sup>15</sup>, Dr Hannah C Howson-Wells PhD <sup>15</sup>, Dr Amelia  
1230 Joseph PhD <sup>15</sup>, Manjinder Khakh <sup>15</sup>, Dr Michelle M Lister PhD <sup>15</sup>, Paul W Bird MSc, MRes <sup>16</sup>,  
1231 Karlie Fallon <sup>16</sup>, Thomas Helmer <sup>16</sup>, Dr Claire L McMurray PhD <sup>16</sup>, Mina Odedra BSc <sup>16</sup>,  
1232 Jessica Shaw BSc <sup>16</sup>, Dr Julian W Tang PhD <sup>16</sup>, Nicholas J Willford MSc <sup>16</sup>, Victoria Blakey  
1233 BSc <sup>17</sup>, Dr Veena Raviprakash MD <sup>17</sup>, Nicola Sheriff BSc <sup>17</sup>, Lesley-Anne Williams BSc <sup>17</sup>,  
1234 Theresa Feltwell MSc <sup>20</sup>, Dr Luke Bedford PhD <sup>26</sup>, Dr James S Cargill PhD <sup>27</sup>, Warwick  
1235 Hughes MSc <sup>27</sup>, Dr Jonathan Moore MD <sup>28</sup>, Susanne Stonehouse BSc <sup>28</sup>, Laura Atkinson  
1236 MSc <sup>29</sup>, Jack CD Lee MSc <sup>29</sup>, Dr Divya Shah PhD <sup>29</sup>, Adela Alcolea-Medina Clinical scientist  
1237 <sup>32, 112</sup>, Natasha Ohemeng-Kumi MSc <sup>32, 112</sup>, John Ramble MSc <sup>32, 112</sup>, Jasveen Sehmi MSc <sup>32</sup>,  
1238 <sup>112</sup>, Dr Rebecca Williams BMBS <sup>33</sup>, Wendy Chatterton MSc <sup>34</sup>, Monika Pusok MSc <sup>34</sup>, William  
1239 Everson MSc <sup>37</sup>, Anibolina Castigador IBMS HCPC <sup>44</sup>, Emily Macnaughton FRCPATH <sup>44</sup>, Dr  
1240 Kate El Bouzidi MRCP <sup>45</sup>, Dr Temi Lampejo FRCPATH <sup>45</sup>, Dr Malur Sudhanva FRCPATH <sup>45</sup>,  
1241 Cassie Breen BSc <sup>47</sup>, Dr Graciela Sluga MD, MSc <sup>48</sup>, Dr Shazaad SY Ahmad MSc <sup>49, 70</sup>, Dr  
1242 Ryan P George PhD <sup>49</sup>, Dr Nicholas W Machin MSc <sup>49, 70</sup>, Debbie Binns BSc <sup>50</sup>, Victoria  
1243 James BSc <sup>50</sup>, Dr Rachel Blacow MBCHB <sup>55</sup>, Dr Lindsay Coupland PhD <sup>58</sup>, Dr Louise Smith  
1244 PhD <sup>59</sup>, Dr Edward Barton MD <sup>60</sup>, Debra Padgett BSc <sup>60</sup>, Garren Scott BSc <sup>60</sup>, Dr Aidan Cross



1245 MBCHB <sup>61</sup>, Dr Mariyam Mirfenderesky FRCPATH <sup>61</sup>, Jane Greenaway MSc <sup>62</sup>, Kevin Cole <sup>64</sup>,  
 1246 Phillip Clarke <sup>67</sup>, Nichola Duckworth <sup>67</sup>, Sarah Walsh <sup>67</sup>, Kelly Bicknell <sup>68</sup>, Robert Impey MSc  
 1247 <sup>68</sup>, Dr Sarah Wyllie PhD <sup>68</sup>, Richard Hopes <sup>70</sup>, Dr Chloe Bishop PhD <sup>72</sup>, Dr Vicki Chalker PhD  
 1248 <sup>72</sup>, Dr Ian Harrison PhD <sup>72</sup>, Laura Gifford MSc <sup>74</sup>, Dr Zoltan Molnar PhD <sup>77</sup>, Dr Cressida  
 1249 Auckland FRCPATH <sup>79</sup>, Dr Cariad Evans PhD <sup>85, 109</sup>, Dr Kate Johnson PhD <sup>85, 109</sup>, Dr David G  
 1250 Partridge FRCP, FRCPATH <sup>85, 109</sup>, Dr Mohammad Raza PhD <sup>85, 109</sup>, Paul Baker MD <sup>86</sup>, Prof  
 1251 Stephen Bonner PhD <sup>86</sup>, Sarah Essex <sup>86</sup>, Leanne J Murray <sup>86</sup>, Andrew I Lawton MSc <sup>87</sup>, Dr  
 1252 Shirelle Burton-Fanning MD <sup>89</sup>, Dr Brendan Al Payne MD <sup>89</sup>, Dr Sheila Waugh MD <sup>89</sup>, Andrea  
 1253 N Gomes MSc <sup>91</sup>, Maimuna Kimuli MSc <sup>91</sup>, Darren R Murray MSc <sup>91</sup>, Paula Ashfield MSc <sup>92</sup>,  
 1254 Dr Donald Dobie MBCHB <sup>92</sup>, Dr Fiona Ashford PhD <sup>93</sup>, Dr Angus Best PhD <sup>93</sup>, Dr Liam  
 1255 Crawford PhD <sup>93</sup>, Dr Nicola Cumley PhD <sup>93</sup>, Dr Megan Mayhew PhD <sup>93</sup>, Dr Oliver Megram  
 1256 PhD <sup>93</sup>, Dr Jeremy Mirza PhD <sup>93</sup>, Dr Emma Moles-Garcia PhD <sup>93</sup>, Dr Benita Percival PhD <sup>93</sup>,  
 1257 Megan Driscoll BSc <sup>96</sup>, Leah Ensell BSc <sup>96</sup>, Dr Helen L Lowe PhD <sup>96</sup>, Laurentiu Maftai BSc <sup>96</sup>,  
 1258 Matteo Mondani MSc <sup>96</sup>, Nicola J Chaloner BSc <sup>99</sup>, Benjamin J Cogger BSc <sup>99</sup>, Lisa J Easton  
 1259 MSc <sup>99</sup>, Hannah Huckson BSc <sup>99</sup>, Jonathan Lewis MSc, PgD, FIBMS <sup>99</sup>, Sarah Lowdon BSc  
 1260 <sup>99</sup>, Cassandra S Malone MSc <sup>99</sup>, Florence Munemo BSc <sup>99</sup>, Manasa Mutingwende MSc <sup>99</sup>,  
 1261 Roberto Nicodemi BSc <sup>99</sup>, Olga Podplomyk FD <sup>99</sup>, Thomas Somassa BSc <sup>99</sup>, Dr Andrew  
 1262 Beggs PhD <sup>100</sup>, Dr Alex Richter PhD <sup>100</sup>, Claire Cormie <sup>102</sup>, Joana Dias MSc <sup>102</sup>, Sally Forrest  
 1263 BSc <sup>102</sup>, Dr Ellen E Higginson PhD <sup>102</sup>, Mailis Maes MPhil <sup>102</sup>, Jamie Young BSc <sup>102</sup>, Dr Rose  
 1264 K Davidson PhD <sup>103</sup>, Kathryn A Jackson MSc <sup>107</sup>, Dr Lance Turtle PhD, MRCP <sup>107</sup>, Dr  
 1265 Alexander J Keeley MRCP <sup>109</sup>, Prof Jonathan Ball PhD <sup>113</sup>, Timothy Byaruhanga MSc <sup>113</sup>, Dr  
 1266 Joseph G Chappell PhD <sup>113</sup>, Jayasree Dey MSc <sup>113</sup>, Jack D Hill MSc <sup>113</sup>, Emily J Park MSc  
 1267 <sup>113</sup>, Arezou Fanaie MSc <sup>114</sup>, Rachel A Hilson MSc <sup>114</sup>, Geraldine Yaze MSc <sup>114</sup> and Stephanie  
 1268 Lo <sup>116</sup>

1269  
1270 Sequencing and analysis:

1271 Safiah Afifi BSc <sup>10</sup>, Robert Beer BSc <sup>10</sup>, Joshua Maksimovic FD <sup>10</sup>, Kathryn McCluggage  
 1272 Masters <sup>10</sup>, Karla Spellman FD <sup>10</sup>, Catherine Bresner BSc <sup>11</sup>, William Fuller BSc <sup>11</sup>, Dr Angela  
 1273 Marchbank BSc <sup>11</sup>, Trudy Workman HNC <sup>11</sup>, Dr Ekaterina Shelest PhD <sup>13, 81</sup>, Dr Johnny  
 1274 Debebe PhD <sup>18</sup>, Dr Fei Sang PhD <sup>18</sup>, Dr Marina Escalera Zamudio PhD <sup>23</sup>, Dr Sarah Francois  
 1275 PhD <sup>23</sup>, Bernardo Gutierrez MSc <sup>23</sup>, Dr Tetyana I Vasylyeva DPhil <sup>23</sup>, Dr Flavia Flaviani PhD  
 1276 <sup>31</sup>, Dr Manon Ragonnet-Cronin PhD <sup>39</sup>, Dr Katherine L Smollett PhD <sup>42</sup>, Alice Broos BSc <sup>53</sup>,  
 1277 Daniel Mair BSc <sup>53</sup>, Jenna Nichols BSc <sup>53</sup>, Dr Kyriaki Nomikou PhD <sup>53</sup>, Dr Lily Tong PhD <sup>53</sup>,  
 1278 Ioulia Tsatsani MSc <sup>53</sup>, Prof Sarah O'Brien PhD <sup>54</sup>, Prof Steven Rushton PhD <sup>54</sup>, Dr Roy  
 1279 Sanderson PhD <sup>54</sup>, Dr Jon Perkins MBCHB <sup>55</sup>, Seb Cotton MSc <sup>56</sup>, Abbie Gallagher BSc <sup>56</sup>,  
 1280 Dr Elias Allara MD, PhD <sup>70, 102</sup>, Clare Pearson MSc <sup>70, 102</sup>, Dr David Bibby PhD <sup>72</sup>, Dr Gavin  
 1281 Dabrera PhD <sup>72</sup>, Dr Nicholas Ellaby PhD <sup>72</sup>, Dr Eileen Gallagher PhD <sup>72</sup>, Dr Jonathan Hubb  
 1282 PhD <sup>72</sup>, Dr Angie Lackenby PhD <sup>72</sup>, Dr David Lee PhD <sup>72</sup>, Nikos Manesis <sup>72</sup>, Dr Tamyó Mbisa  
 1283 PhD <sup>72</sup>, Dr Steven Platt PhD <sup>72</sup>, Katherine A Twohig <sup>72</sup>, Dr Mari Morgan PhD <sup>74</sup>, Alp Aydin  
 1284 MSci <sup>75</sup>, David J Baker BEng <sup>75</sup>, Dr Ebenezer Foster-Nyarko PhD <sup>75</sup>, Dr Sophie J Prosolek  
 1285 PhD <sup>75</sup>, Steven Rudder <sup>75</sup>, Chris Baxter BSc <sup>77</sup>, Sílvia F Carvalho MSc <sup>77</sup>, Dr Deborah Lavin  
 1286 PhD <sup>77</sup>, Dr Arun Mariappan PhD <sup>77</sup>, Dr Clara Radulescu PhD <sup>77</sup>, Dr Aditi Singh PhD <sup>77</sup>, Miao  
 1287 Tang MD <sup>77</sup>, Helen Morcrette BSc <sup>79</sup>, Nadua Bayzid BSc <sup>96</sup>, Marius Cotic MSc <sup>96</sup>, Dr Carlos E  
 1288 Balcazar PhD <sup>104</sup>, Dr Michael D Gallagher PhD <sup>104</sup>, Dr Daniel Maloney PhD <sup>104</sup>, Thomas D  
 1289 Stanton BSc <sup>104</sup>, Dr Kathleen A Williamson PhD <sup>104</sup>, Dr Robin Manley PhD <sup>105</sup>, Michelle L  
 1290 Michelsen BSc <sup>105</sup>, Dr Christine M Sambles PhD <sup>105</sup>, Dr David J Studholme PhD <sup>105</sup>, Joanna  
 1291 Warwick-Dugdale BSc <sup>105</sup>, Richard Eccles MSc <sup>107</sup>, Matthew Gemmell MSc <sup>107</sup>, Dr Richard  
 1292 Gregory PhD <sup>107</sup>, Dr Margaret Hughes PhD <sup>107</sup>, Charlotte Nelson MSc <sup>107</sup>, Dr Lucille Rainbow

1293 PhD <sup>107</sup>, Dr Edith E Vamos PhD <sup>107</sup>, Hermione J Webster BSc <sup>107</sup>, Dr Mark Whitehead PhD  
1294 <sup>107</sup>, Claudia Wierzbicki BSc <sup>107</sup>, Dr Adrienn Angyal PhD <sup>109</sup>, Dr Luke R Green PhD <sup>109</sup>, Dr Max  
1295 Whiteley PhD <sup>109</sup>, Emma Betteridge BSc <sup>116</sup>, Dr Iraad F Bronner PhD <sup>116</sup>, Ben W Farr BSc <sup>116</sup>,  
1296 Scott Goodwin MSc <sup>116</sup>, Dr Stefanie V Lensing PhD <sup>116</sup>, Shane A McCarthy <sup>116, 102</sup>, Dr Michael  
1297 A Quail PhD <sup>116</sup>, Diana Rajan MSc <sup>116</sup>, Dr Nicholas M Redshaw PhD <sup>116</sup>, Carol Scott <sup>116</sup>,  
1298 Lesley Shirley MSc <sup>116</sup> and Scott AJ Thurston BSc <sup>116</sup>

1299

1300 Software and analysis tools:

1301 Dr Will Rowe PhD<sup>43</sup>, Amy Gaskin MSc <sup>74</sup>, Dr Thanh Le-Viet PhD <sup>75</sup>, James Bonfield BSc <sup>116</sup>,  
1302 Jennifer Liddle <sup>116</sup> and Andrew Whitwham BSc <sup>116</sup>

1303

1304 1 Barking, Havering and Redbridge University Hospitals NHS Trust, 2 Barts Health NHS Trust, 3  
1305 Belfast Health & Social Care Trust, 4 Betsi Cadwaladr University Health Board, 5 Big Data Institute,  
1306 Nuffield Department of Medicine, University of Oxford, 6 Blackpool Teaching Hospitals NHS  
1307 Foundation Trust, 7 Bournemouth University, 8 Cambridge Stem Cell Institute, University of  
1308 Cambridge, 9 Cambridge University Hospitals NHS Foundation Trust, 10 Cardiff and Vale University  
1309 Health Board, 11 Cardiff University, 12 Centre for Clinical Infection and Diagnostics Research,  
1310 Department of Infectious Diseases, Guy's and St Thomas' NHS Foundation Trust, 13 Centre for  
1311 Enzyme Innovation, University of Portsmouth, 14 Centre for Genomic Pathogen Surveillance,  
1312 University of Oxford, 15 Clinical Microbiology Department, Queens Medical Centre, Nottingham  
1313 University Hospitals NHS Trust, 16 Clinical Microbiology, University Hospitals of Leicester NHS Trust,  
1314 17 County Durham and Darlington NHS Foundation Trust, 18 Deep Seq, School of Life Sciences,  
1315 Queens Medical Centre, University of Nottingham, 19 Department of Infectious Diseases and  
1316 Microbiology, Cambridge University Hospitals NHS Foundation Trust, 20 Department of Medicine,  
1317 University of Cambridge, 21 Department of Microbiology, Kettering General Hospital, 22 Department  
1318 of Microbiology, South West London Pathology, 23 Department of Zoology, University of Oxford, 24  
1319 Division of Virology, Department of Pathology, University of Cambridge, 25 East Kent Hospitals  
1320 University NHS Foundation Trust, 26 East Suffolk and North Essex NHS Foundation Trust, 27 East  
1321 Sussex Healthcare NHS Trust, 28 Gateshead Health NHS Foundation Trust, 29 Great Ormond Street  
1322 Hospital for Children NHS Foundation Trust, 30 Great Ormond Street Institute of Child Health (GOS  
1323 ICH), University College London (UCL), 31 Guy's and St. Thomas' Biomedical Research Centre, 32  
1324 Guy's and St. Thomas' NHS Foundation Trust, 33 Hampshire Hospitals NHS Foundation Trust, 34  
1325 Health Services Laboratories, 35 Heartlands Hospital, Birmingham, 36 Hub for Biotechnology in the  
1326 Built Environment, Northumbria University, 37 Hull University Teaching Hospitals NHS Trust, 38  
1327 Imperial College Healthcare NHS Trust, 39 Imperial College London, 40 Infection Care Group, St  
1328 George's University Hospitals NHS Foundation Trust, 41 Institute for Infection and Immunity, St  
1329 George's University of London, 42 Institute of Biodiversity, Animal Health & Comparative Medicine, 43  
1330 Institute of Microbiology and Infection, University of Birmingham, 44 Isle of Wight NHS Trust, 45  
1331 King's College Hospital NHS Foundation Trust, 46 King's College London, 47 Liverpool Clinical  
1332 Laboratories, 48 Maidstone and Tunbridge Wells NHS Trust, 49 Manchester University NHS  
1333 Foundation Trust, 50 Microbiology Department, Buckinghamshire Healthcare NHS Trust, 51  
1334 Microbiology, Royal Oldham Hospital, 52 MRC Biostatistics Unit, University of Cambridge, 53 MRC-  
1335 University of Glasgow Centre for Virus Research, 54 Newcastle University, 55 NHS Greater Glasgow  
1336 and Clyde, 56 NHS Lothian, 57 NIHR Health Protection Research Unit in HCAI and AMR, Imperial  
1337 College London, 58 Norfolk and Norwich University Hospitals NHS Foundation Trust, 59 Norfolk  
1338 County Council, 60 North Cumbria Integrated Care NHS Foundation Trust, 61 North Middlesex  
1339 University Hospital NHS Trust, 62 North Tees and Hartlepool NHS Foundation Trust, 63 North West  
1340 London Pathology, 64 Northumbria Healthcare NHS Foundation Trust, 65 Northumbria University, 66  
1341 NU-OMICS, Northumbria University, 67 Path Links, Northern Lincolnshire and Goole NHS Foundation  
1342 Trust, 68 Portsmouth Hospitals University NHS Trust, 69 Public Health Agency, Northern Ireland, 70  
1343 Public Health England, 71 Public Health England, Cambridge, 72 Public Health England, Colindale,

1344 73 Public Health Scotland, 74 Public Health Wales, 75 Quadram Institute Bioscience, 76 Queen  
1345 Elizabeth Hospital, Birmingham, 77 Queen's University Belfast, 78 Royal Brompton and Harefield  
1346 Hospitals, 79 Royal Devon and Exeter NHS Foundation Trust, 80 Royal Free London NHS  
1347 Foundation Trust, 81 School of Biological Sciences, University of Portsmouth, 82 School of Health  
1348 Sciences, University of Southampton, 83 School of Medicine, University of Southampton, 84 School of  
1349 Pharmacy & Biomedical Sciences, University of Portsmouth, 85 Sheffield Teaching Hospitals NHS  
1350 Foundation Trust, 86 South Tees Hospitals NHS Foundation Trust, 87 Southwest Pathology Services,  
1351 88 Swansea University, 89 The Newcastle upon Tyne Hospitals NHS Foundation Trust, 90 The  
1352 Queen Elizabeth Hospital King's Lynn NHS Foundation Trust, 91 The Royal Marsden NHS  
1353 Foundation Trust, 92 The Royal Wolverhampton NHS Trust, 93 Turnkey Laboratory, University of  
1354 Birmingham, 94 University College London Division of Infection and Immunity, 95 University College  
1355 London Hospital Advanced Pathogen Diagnostics Unit, 96 University College London Hospitals NHS  
1356 Foundation Trust, 97 University Hospital Southampton NHS Foundation Trust, 98 University Hospitals  
1357 Dorset NHS Foundation Trust, 99 University Hospitals Sussex NHS Foundation Trust, 100 University  
1358 of Birmingham, 101 University of Brighton, 102 University of Cambridge, 103 University of East  
1359 Anglia, 104 University of Edinburgh, 105 University of Exeter, 106 University of Kent, 107 University of  
1360 Liverpool, 108 University of Oxford, 109 University of Sheffield, 110 University of Southampton, 111  
1361 University of St Andrews, 112 Viapath, Guy's and St Thomas' NHS Foundation Trust, and King's  
1362 College Hospital NHS Foundation Trust, 113 Virology, School of Life Sciences, Queens Medical  
1363 Centre, University of Nottingham, 114 Watford General Hospital, 115 Wellcome Centre for Human  
1364 Genetics, Nuffield Department of Medicine, University of Oxford, 116 Wellcome Sanger Institute, 117  
1365 West of Scotland Specialist Virology Centre, NHS Greater Glasgow and Clyde, 118 Whittington  
1366 Health NHS Trust  
1367
